Body mass index trajectories and adiposity rebound during the first 6 years in Korean children: based on the National Health Information Database, 2008-2015

Il Tae Hwang<sup>1</sup>, Young-Su Ju<sup>2</sup>, Hye Jin Lee<sup>1</sup>, Young Suk Shim<sup>1</sup>, Hwal Rim Jeong<sup>3</sup>, and Min Jae Kang<sup>1\*</sup>

<sup>1</sup> Department of Pediatrics, Hallym University College of Medicine, Chuncheon, Korea

<sup>2</sup> Department of Occupational and Environmental Medicine, National Medical Center, Seoul, Korea

<sup>3</sup> Department of Pediatrics, Soonchunhyang University College of Medicine, Cheonan, Korea

**\*Corresponding author**

E-Mail: [remoni80@gmail.com](mailto:remoni80@gmail.com); [mjkang@hallym.or.kr](mailto:mjkang@hallym.or.kr) (MJK)

## Abstract

### Purpose

We analyzed the nationwide longitudinal data to explore body mass index (BMI) growth trajectories and the time of adiposity rebound (AR).

### Methods

Personal data of 84,005 subjects born between 2008 and 2012 were obtained from infant health check-ups which were performed at 5, 11, 21, 33, 45, 57, and 69 months. BMI trajectories of each subject were made according to sex and birth weight (Bwt) and the timing of AR was defined as the lowest BMI occurred. Subjects were divided according to Bwt and AR timing as follows: very low birth weight (VLBW),  $0.5 \text{ kg} \leq \text{Bwt} \leq 1.5 \text{ kg}$ ; low birth weight (LBW),  $1.5 \text{ kg} < \text{Bwt} \leq 2.5 \text{ kg}$ ; non-LBW,  $2.5 \text{ kg} < \text{Bwt} \leq 5.0 \text{ kg}$ ; early AR, before 45 months; moderate AR, at 57 months; and late AR, not until 69 months.

### Main results

Median time point of minimum BMI was 45 months, and the prevalence rates of early, moderate, and late AR were 63.0%, 16.6%, and 20.4%, respectively. BMI at the age of 57 months showed a strong correlation with AR timing after controlling for Bwt ( $P < 0.001$ ). Sugar-sweetened beverage intake at 21 months ( $P = 0.02$ ) and no-exercise habit at 57 months ( $P < 0.001$ ) showed correlations with early AR. When VLBW and LBW subjects were analyzed, BMI at 57 months and breastfeeding at 11 months were correlated with rapid weight gain during the first 5 months (both  $P < 0.001$ ).

### Conclusions

Based on this first longitudinal study, the majority of children showed AR before 57 months and the degree of obesity at the age of 57 months had a close correlation with early AR or early weight during infancy.

**Key words:** body mass index; longitudinal study; adiposity rebound; obesity

## Introduction

The trajectory of an individual's body mass index (BMI) during life is quite variable. The BMI rapidly increases during the first year, then subsequently decreases and reaches a nadir around 4-8 years of age [1]. Thereafter, BMI increases again and this second rise following the last minimum BMI is referred to as the adiposity rebound (AR) [2]. The timing of AR is well-known to have a close relationship with obesity in later childhood, adolescence, and adulthood [3-7]. Although the definition of early AR varies according to studies, children who had early AR showed later obesity, insulin resistance, dyslipidemia, and hypertension [3,5,8]. Therefore, early AR is considered as a potent marker for obesity and metabolic syndrome.

The rapid postnatal weight gain showed an increased risk of early AR, obesity, and metabolic complications, especially in children born small-for-gestational age (SGA) [4,9]. Catch-up growth, which is attained by a period of supra-normal growth velocity in SGA children, is essential to gain a normal growth, but an emphasis on adequate nutritional support during early infancy is important not to gain overgrowth too rapidly. A recent study revealed that gestational age *per se* was an independent factor for the timing of AR in SGA children [10]; all together, these suggested that we should look at the BMI trajectory of SGA children more carefully.

Like secular changes in body size and tempo of growth have occurred in most countries, the timing of AR has shifted by better nutrition, hygiene, and health status [11]. This shifting of AR timing was observed not only in children with overweight and obesity, but also in children with low BMI [12]. To date, there has not been any longitudinal data available for individual's BMI in Korea. However, the National Health Information Database (NHID)

enabled us to explore sex- and birth weight- specific BMI growth trajectories of children born in the 21<sup>st</sup> century. Along with this, we also analyzed the timing of AR and related factors to early AR, especially in children born at low birth weight.

## Materials and methods

### Subjects and measurements

The longitudinal national cohort in NHID included the sampling unit (5% of total population) from infants and children born between January 2008 and December 2012 in South Korea. The NHID is a public database on health care utilization, health screening, socio-demographic variables, and mortality covering the whole population of South Korea and was formed by the National Health Insurance Service (NHIS) [13]. Health check-ups for infants conducted by the NHIS include mandatory examinations for growth, development assessments, dental exams, and infant care consultations reflecting health education. The infants and children may undergo seven screenings (Exams I–VII) at 4-6, 9-12, 18-24, 30-36, 42-48, 54-60, and 66-71 months of age. The median age at each exam (5, 11, 21, 33, 45, 57, and 69 months of age) was selected for analysis. The NHID covered data of 84,005 infants (based on Exam-I) and included 357,414 data points.

Data of height, weight, and BMI at each exam were retrieved. Most measurements were performed at primary health clinics. Length instead of height was used before 24 months of age and BMI was calculated as weight divided by (height or length)<sup>2</sup>. As gestational age (GA) data were not available from the NHID, subjects with birth weight between 0.5 kg (which corresponds to the 3<sup>rd</sup> percentile for 23 weeks GA [14]) and 5.0 kg (which corresponds to +3.0 z-score of the male Korean standard) were included to remove outliers or errors. Height and weight at each exam was selected only when those values had increased compared to that in the previous exam, with minimum values of 25 cm (which corresponds to the 3<sup>rd</sup> percentile for 23 weeks GA [14]) and birth weight, respectively. An individual's longitudinal data were included when there were at least five valid height and weight measurements from seven

health check-ups. Therefore, 27,143 infants (based on Exam-I) with a total of 153,261 data points were analyzed in this study (Fig 1). Some questionnaires at each exam related to diet, exercise, lifestyle, and family history of metabolic syndrome were selected. The institutional Review Boards of Hallym Medical Center (IRB# KANGDONG 2018-01-001) approved this study.

### **Fig 1. Flow chart of the study sample size**

## **Definition of subgroups according to birth weight, timing of AR, and rapid weight gain during early infancy**

All subjects were divided into three subgroups according to birth weight as follows: very low birth weight (VLBW),  $0.5 \text{ kg} \leq \text{birth weight} \leq 1.5 \text{ kg}$ ; low birth weight (LBW),  $1.5 \text{ kg} < \text{birth weight} \leq 2.5 \text{ kg}$ ; and non-LBW,  $2.5 \text{ kg} < \text{birth weight} \leq 5.0 \text{ kg}$ . There were 100 subjects (47 males and 53 females) in the VLBW group, 1,796 (802 males and 994 females) in the LBW group, and 25,247 (12,992 males and 12,255 females) in the non-LBW group.

Seven health check-ups did not provide sufficient frequencies to identify the exact age of AR. Therefore, we determined the timing of AR at which the lowest BMI occurred as in the previous study [5]. The definition of early AR also varied according to studies [2,10]. In this study, we defined subgroups according to the timing of AR as follows: early AR, timing of AR before 45 months of age (Exam-V); moderate AR, timing of AR at 57 months of age (Exam-VI); and late AR, no AR until 69 months of age (Exam-VII). If minimum BMI was not identifiable, we considered that individual's data as missing. Therefore, the number of

subjects involved in AR timing analysis was 16,207 infants.

As rapid weight gain during early infancy is related to the development of later obesity [15], subjects were divided into two subgroups according to weight gain in the first 5 months (between birth and Exam-I). The rapid weight gain group included subjects who gained weight greater than or equal to 5.1 kg (which corresponds to the 99<sup>th</sup> percentile of the male Korean standard), while the non-rapid weight gain group included subjects who gained weight < 5.1 kg in the first 5 months.

The high BMI at age 5 years are also known as an important predictor to later obesity [11]. Therefore, we analyzed the BMI status at 57 months of age (Exam-VI) and classified as follows: underweight, BMI < 5<sup>th</sup> percentile; normal weight, 5<sup>th</sup> percentile  $\leq$  BMI < 85<sup>th</sup> percentile; overweight, 85<sup>th</sup> percentile  $\leq$  BMI < 95<sup>th</sup> percentile; and obesity, BMI  $\geq$  95<sup>th</sup> percentile.

## Data analysis

Data were presented as mean  $\pm$  standard deviation (SD). Comparisons of BMI trajectories over time between groups divided according to sex, birth weight, and AR timing were analyzed using a mixed model. Comparisons of AR timing distributions between subgroups were analyzed using the chi-square or likelihood ratio test. Comparisons of questionnaire variables related to AR among subgroups based on AR timing and rapid weight gain during early infancy were analyzed using multiple logistic regression or analysis of covariance. The odds ratio for AR timing was calculated for BMI z-score at 57 months of age (Exam-VI) by multiple logistic regressions. All statistical analyses were performed in SAS Enterprise Guide 7.1 (SAS Inc., Cary, NC). *P*-value < 0.05 was considered significant.





## Results

### BMI trajectories during the first 6 years

In all subjects, the mean BMI values at the ages of 5, 11, 21, 33, 45, 57, and 69 months were 17.8, 17.2, 16.3, 16.0, 15.9, 15.9, and 16.0 kg/m<sup>2</sup>, respectively. There were differences in BMI values at each time point and BMI trajectories between male (Fig 2A) and female (Fig 2B) during the follow-up periods (all  $P < 0.001$ ). BMI trajectories over time of the non-LBW subjects showed significant differences compared to those of LBW or VLBW subjects (all  $P < 0.001$ , Fig 3). However, there were no difference in BMI trajectories between the LBW and VLBW subjects ( $P = 0.36$ ).

**Fig 2. BMI percentile curves for subjects according to sex (A, males; B, females).** Lines are 1st, 3rd, 5th, 10th, 15th, 25th, 50th, 75th, 85th, 90th, 95th, 97th, and 99th percentile curves from bottom to top, in order.

**Fig 3. BMI percentile curves for subjects according to birth weight. (A-C) males and (D-F) females.** Lines are 1st, 3rd, 5th, 10th, 15th, 25th, 50th, 75th, 85th, 90th, 95th, 97th, and 99th percentile curves from bottom to top, in order.

### The timing of adiposity rebound

Of total subjects, 63.0%, 16.6%, and 20.4% showed early, moderate, and late AR,

respectively. The number of subjects were 10,209 (5,057 males and 5,152 females) in the early AR group, 2,697 (1,390 males and 1,307 females) in the moderate AR group, and 3,301 (1,748 males and 1,553 females) in the late AR group. The median and mode of the timing of AR was 45 months (Exam-V) and 33 months (Exam-IV) of age, respectively, in all subjects. Based on cumulative prevalence rates of the timing of AR, over 79% of subjects showed AR at age 57 months (Exam-VI) regardless of sex and birth weight (Table 1). The timing of AR did not differ among the VLBW, LBW, and non-LBW groups ( $P = 0.12$ ) or between the VLBW+LBW and non-LBW groups ( $P = 0.42$ ). BMI trajectories over time in the late AR group showed significant differences compared to those in the early AR or moderate AR groups (all  $P < 0.001$ , Fig 4). However, there were no differences in BMI trajectories between the early AR and moderate AR groups ( $P = 0.89$ ).

**Table 1. Cumulative prevalence rates of the timing of adiposity rebound by sex and birth weight**

| Exam | Median age | Total  | Male   | Female | VLBW   | LBW    | Non-LBW |
|------|------------|--------|--------|--------|--------|--------|---------|
| I    | 5 months   | 0.2%   | 0.3%   | 0.2%   | 1.5%   | 0.0%   | 0.2%    |
| II   | 11 months  | 1.0%   | 1.0%   | 1.0%   | 3.1%   | 0.8%   | 1.0%    |
| III  | 21 months  | 11.4%  | 10.1%  | 12.7%  | 7.7%   | 11.3%  | 11.4%   |
| IV   | 33 months  | 39.9%  | 38.9%  | 40.9%  | 33.8%  | 39.4%  | 40.0%   |
| V    | 45 months  | 63.0%  | 61.7%  | 64.3%  | 53.8%  | 63.7%  | 63.0%   |
| VI   | 57 months  | 79.6%  | 78.7%  | 80.6%  | 83.1%  | 80.7%  | 79.5%   |
| VII  | 69 months  | 100.0% | 100.0% | 100.0% | 100.0% | 100.0% | 100.0%  |

Abbreviations: VLBW, very low birth weight; LBW, low birth weight; non-LBW, non-low birth weight.

**Fig 4. BMI percentile curves for subjects according to timing of adiposity rebound. (A-C) males and (D-F) females. Lines are 1st, 3rd, 5th, 10th, 15th, 25th, 50th, 75th, 85th, 90th, 95th, 97th, and 99th percentile curves from bottom to top, in order.**

## Related factors to the timing of adiposity rebound

BMI at age 57 months (Exam-VI) showed strong correlation with AR timing after controlling for birth weight ( $P < 0.001$ ). The prevalence rates of overweight and obesity at age 57 months in the early AR group (12.6% and 12.5%, respectively) were significantly higher than those in the moderate AR (4.9% and 2.1%, respectively) and late AR (5.9% and 1.4%, respectively) groups ( $P < 0.001$ ). The obese children at age 57 months were 3.7 times more likely than normal weight children to have AR before 57 months (Table 2).

**Table 2. The distributions of BMI status at age 57 months by adiposity rebound groups and the odds ratios for adiposity rebound before 57 months**

| BMI at age 57 months<br>(n=11,106) | Early AR<br>(n=5,879) | Moderate AR<br>(n=2,697) | Late AR<br>(n=2,530) | Adiposity rebound before 57 months |                   |
|------------------------------------|-----------------------|--------------------------|----------------------|------------------------------------|-------------------|
|                                    |                       |                          |                      | Odds ratio (95% C.I)               | <i>P</i> -values* |
| Normal weight                      | 73.2%                 | 84.9%                    | 89.1%                | Reference                          |                   |
| Underweight                        | 1.8%                  | 8.2%                     | 3.6%                 | 0.774 (0.670-0.895)                | < 0.001           |
| Overweight                         | 12.6%                 | 4.9%                     | 5.9%                 | 1.756 (1.572-1.960)                | 0.0009            |
| Obesity                            | 12.5%                 | 2.1%                     | 1.4%                 | 3.705 (3.201-4.288)                | < 0.001           |

\* by multiple logistic regression (adjustment for birth weight)

Based on questionnaires, weaning after 4 months of age (Exam-II,  $P < 0.001$ ), sugar-

sweetened beverage intake at 21 months (Exam-III,  $P = 0.02$ ), and no-exercise habit at 57 months (Exam-VI,  $P < 0.001$ ) demonstrated higher values in the early AR group than in the moderate AR and late AR groups. However, breastfeeding at 11 months (Exam-II) showed no significant correlations with AR timing ( $P = 0.20$ ), and screen time at 57 months (Exam-VI) showed contradictory results (Table 3).

**Table 3. Related factors to timing of adiposity rebound**

| Variables                | Age at survey | N      | Category         | Early AR | Moderate AR | Late AR | <i>P</i> -values* |
|--------------------------|---------------|--------|------------------|----------|-------------|---------|-------------------|
| Breastfeeding            | 11 months     | 13,685 | Breast milk only | 39.4%    | 40.2%       | 37.9%   | 0.20              |
|                          |               |        | Formula, others  | 60.6%    | 59.8%       | 62.1%   |                   |
| Timing of weaning        | 11 months     | 13,843 | Before 4 months  | 3.9%     | 6.4%        | 7.9%    | < 0.001           |
|                          |               |        | After 4 months   | 96.1%    | 93.6%       | 92.1%   |                   |
| Sugar-sweetened beverage | 21 months     | 14,311 | < 200 cc/day     | 92.7%    | 93.9%       | 94.1%   | 0.02              |
|                          |               |        | ≥ 200 cc/day     | 7.3%     | 6.1%        | 5.9%    |                   |
|                          | 33 months     | 14,351 | < 200 cc/day     | 93.6%    | 94.0%       | 93.4%   | 0.71              |
|                          |               |        | ≥ 200 cc/day     | 6.4%     | 6.0%        | 6.6%    |                   |
|                          | 45 months     | 12,777 | < 200 cc/day     | 93.4%    | 93.5%       | 93.9%   | 0.71              |
|                          |               |        | ≥ 200 cc/day     | 6.6%     | 6.5%        | 6.1%    |                   |
| Add salt to baby's food  | 21 months     | 14,385 | Yes              | 84.2%    | 83.8%       | 83.5%   | 0.69              |
|                          |               |        | No               | 15.8%    | 16.2%       | 16.5%   |                   |
| Meal with parents        | 33 months     | 14,392 | ≥ 5 days/week    | 73.5%    | 75.5%       | 74.5%   | 0.12              |
|                          |               |        | ≤ 4 days/week    | 26.5%    | 24.5%       | 25.5%   |                   |
| Having breakfast         | 69 months     | 8,460  | Yes              | 95.7%    | 95.7%       | 95.8%   | 0.98              |
|                          |               |        | No               | 4.3%     | 4.3%        | 4.2%    |                   |
| Screen time              | 57 months     | 9,382  | ≤ 2 hours/day    | 76.4%    | 72.1%       | 71.1%   | < 0.001           |
|                          |               |        | ≥ 3 hours/day    | 23.6%    | 27.9%       | 28.9%   |                   |

|                                      |           |       |     |       |       |       |         |
|--------------------------------------|-----------|-------|-----|-------|-------|-------|---------|
| Exercise habit                       | 57 months | 9,379 | Yes | 86.5% | 98.7% | 99.0% | < 0.001 |
|                                      |           |       | No  | 13.5% | 1.3%  | 1.0%  |         |
| Family history of metabolic syndrome | 57 months | 8,087 | Yes | 45.0% | 42.8% | 45.4% | 0.12    |
|                                      |           |       | No  | 55.0% | 57.2% | 54.6% |         |

---

\*by multiple logistic regression (adjustment for birth weight)

## **Rapid weight gain and adiposity rebound in low birth weight subjects**

Greater weight gain during the first 11 months was observed in the VLBW group (mean 7.7 kg) than in the LBW (6.9 kg) and non-LBW (6.5 kg) groups ( $P < 0.001$ ), and the increment was prominent in the first 5 months (VLBW, 5.7 kg; LBW, 5.1 kg; and non-LBW, 4.8 kg). After 11 months (Exam-II), weight gain velocity did not differ between the VLBW and LBW groups.

Of the 1,129 VLBW and LBW subjects, 569 (50.4%) subjects were included in the rapid weight gain group in the first 5 months. There were no significant differences of timing of AR between the rapid and non-rapid weight gain groups ( $P = 0.63$ ). However, the rapid weight gain group showed greater obesity at age 57 months (Exam-VI, 5.8%) and less breastfeeding at 11 months (Exam-II, 20.4%) than the non-rapid weight gain group (obesity at age 57 months, 1.7%,  $P < 0.001$ ; breastfeeding at 11 months, 28.1%,  $P = 0.0003$ ).

## Discussion

In this study, we demonstrated the BMI trajectories of infants and children born between 2008 and 2012 in Korea. In all subjects, the median time point of AR was 45 months of age, and 79.6% of subjects showed AR before 57 months. And as expected, the LBW and VLBW groups showed different BMI trajectories compared to the non-LBW group. BMI at age 57 months along with diet and exercise habits had close relationships with early AR. Rapid weight gain during the first 5 months in the LBW and VLBW groups showed significant correlations with BMI at age 57 months and breastfeeding; however, AR timing was not relevant.

The timing of AR in the Korean growth standards, which was developed using cross-sectional data from the National Anthropometric Survey in 1997 and 2005 [16], was estimated as 5.5 years (66 months) in both sexes [11]. Considering that we had insufficient frequency of measured data in this study, the median timing of AR would be between 3.8 years (Exam-V) and 4.8 years (Exam-VI) of age, regardless of birth weight and sex. This is about one year earlier than that seen in the Korean standards, which may coincide with the global shifts in AR timing to an earlier age [12,17-19]. The most recent survey conducted in Poland in 2010 showed AR timing of subjects (with median BMIs) as 5.2 years in boys and 3.0 years in girls, which was 2.3-4.4 years earlier than the values obtained in 1983 [17,18].

Interestingly, BMI value at the age of AR was higher and BMI velocity after AR was greater in our subjects than those in the Korean standards [16]. In boys, BMI values at the age of AR for our subjects in the 50<sup>th</sup> percentile and in the corresponding Korean standard were 16.0 and 15.7 kg/m<sup>2</sup>, respectively. And for those in the 95<sup>th</sup> percentile and in the corresponding Korean standard were 18.1 and 17.8 kg/m<sup>2</sup>, respectively. BMI changes between 45 months of age

(Exam-V, median AR timing) and 69 months of age (Exam-VII) were greater in male subjects in the 95<sup>th</sup> percentile (1.2 kg/m<sup>2</sup>) than in the corresponding Korean standard (0.8 kg/m<sup>2</sup>). Differences in minimum BMI values and BMI velocity after AR between our female subjects and the corresponding Korean standards showed similar results to that seen in males. Altogether, these results (AR before 4.8 years of age, higher minimum BMI values, and greater BMI velocity after AR) are in line with increasing obesity, which was also seen in the Fels Longitudinal study [20]. If children have similar genetic background, current environmental issues (such as decreased physical activity, increased screen time, inappropriate feeding practices, and abundant fast foods) compared to that in the past [21], may be held responsible for these results.

Currently, beyond the role of predicting obesity, earlier AR over time may imply the acceleration of growth and development compared to the past. Based on a longitudinal study, shifting of AR timing was observed not only for children with normal weight, overweight, and obesity, but also in underweight children [12,17,18]. Unfortunately, minimum BMI in underweight subjects of the 5<sup>th</sup> percentile was not confirmed during this period, because follow-up period (69 months) was short to confirm AR timing of all subjects in this study. However, Luo *et al.* also reported that earlier AR timing was observed in heavier and taller children compared to lighter and shorter children [22].

A positive relationship between small size at birth and early AR is well known [23]. Around 80% of children born small for gestational age show catch-up growth during the first year of life [24]. Accelerated growth of the entire body contributes to the accelerated growth of fat cells, and this is a critical period for later body composition and fat deposition [1]. In this study, differences of BMI trajectories during 69 months between the non-LBW subjects and the LBW or VLBW subjects were significant. However, contrary to our expectation, AR



timing showed no differences between the birth weight groups. There may be several reasons. First, regarding body compositions, thin children are predisposed to a smaller lean mass [25], which may rebound later than children with proper lean mass. Second, the number of subjects in the LBW and VLBW groups was small, relative to those in the non-LBW group in this study; therefore, this may attenuate the differences in AR timing. Third, gestational age is also an important factor for catch-up growth with a boundary of 37 weeks gestational age [10], but data of gestational period was unavailable in this study.

Gardner *et al.* suggested that by age 5 years, childhood obesity appears relatively resistant to change [26]. In this study, BMI at age 57 months (around 5 years) had a strong relationship with AR timing, and BMI trajectories between the early AR (cutoff 45 months) and moderate AR (cutoff 57 months) groups did not differ significantly. Therefore, taken together, these results support the importance of obesity at age 5 years [27,28]. Moreover, BMI at age 57 months was linked to the rapid weight gain group especially to the LBW and VLBW groups, in this study. This confirms existing evidences that weight gain during infancy is a predictor of later obesity [29]. Botton *et al.* reported that regardless of birth weight, rapid weight gain even in the first 6 months is associated with obesity [30]. Breastfeeding, the only factor known to have protective effect against obesity [11], showed negative correlation with early weight gain during the first 11 months in our study. Therefore, the benefits of breastfeeding in LBW and VLBW infants cannot be overestimated [8].

Among other factors related to early AR, parental BMIs, especially BMI of the mother, who mostly share an environment of diet habit or activity, was closely associated [20,27,31,32]. However, the relationship between early AR and screen time [33], protein intake [34], or socioeconomic status [19,27,32] remains uncertain. Factors related to early AR such as later weaning, additional sugar-sweetened beverage intakes, and no-exercise habit showed

expected results in this study, but as there are many confounding factors within the survey data, verifications are required.

A major limitation in this study is that the exact timing of AR is difficult to judge. The best way is to trace an individual's adiposity plot through visual inspection [2,35]; however, most often, there is insufficient frequency of measured data to allow the use of this method. To compensate for this problem, various statistical approaches [5,7,35-37] or the researchers' own definitions [10,27,38] were used. Second, definitions of early AR also varied according to literatures. Generally early AR was defined before 5 years of age [2], however, over 75% of subjects had AR before 57 months in this study, so we defined early AR as before 45 months (around 4 years of age) which time was the median value of AR timing. Therefore, while comparing AR timing between contemporary studies, methods of determining AR should be carefully considered. Third, the small sample size at age 69 months (Exam-VII) and no data of gestational age could be limitations. The NHID only included 5% of total population and after deleting outliers, about 30% of initial subjects were finally included. However, this is the first national cohort study on infancy and early childhood based on individual longitudinal data; this may be sufficient to overcome any drawbacks of this study.

One of the critical periods in life for the development of obesity is the period of AR [39]. Most of Korean children in the 21<sup>st</sup> century showed early AR before 57 months and their diet and exercise habits may be related to early AR or early weight gain during infancy. This may be a warning sign for later obesity or early maturation problems, such as precocious puberty. Therefore, our results support the need of population-based preventive interventions.

## **Acknowledgments**

We thank to the National Health Insurance Service providing this valuable data.

## **Statement of financial support**

This study was supported by Grant no. 2018-03 from the Kangdong Sacred Heart Hospital Fund.

## **Disclosure statement**

The authors declare no conflict of interest.

## Author Contributions

Conceptualization: Min Jae Kang

Data curation: Min Jae Kang

Formal analysis: Young-Su Ju, Min Jae Kang

Funding acquisition: Il Tae Hwang, Min Jae Kang

Investigation: Il Tae Hwang, Young-Su Ju, Min Jae Kang

Methodology: Il Tae Hwang, Young-Su Ju, Hye Jin Lee, Young Suk Shim, Hwal Rim Jeong,  
Min Jae Kang

Project administration: Min Jae Kang.

Resources: Il Tae Hwang, Young-Su Ju, Min Jae Kang

Software: Young-Su Ju.

Supervision: Il Tae Hwang, Young-Su Ju, Hye Jin Lee, Young Suk Shim, Hwal Rim Jeong,  
Min Jae Kang

Validation: Il Tae Hwang, Young-Su Ju, Hye Jin Lee, Young Suk Shim, Hwal Rim Jeong,  
Min Jae Kang

Visualization: Il Tae Hwang, Min Jae Kang

Writing – original draft: Min Jae Kang

Writing – review & editing: Il Tae Hwang, Young-Su Ju, Hye Jin Lee, Young Suk Shim,

Hwal Rim Jeong

## References

1. Brisbois TD, Farmer AP, McCargar LJ: Early markers of adult obesity: a review. *Obes Rev.* 2012;13:347-367. doi: 10.1111/j.1467-789X.2011.00965.x PMID: 22171945
2. Rolland-Cachera MF, Deheeger M, Bellisle F, Sempe M, Guilloud-Bataille M, Patois E: Adiposity rebound in children: a simple indicator for predicting obesity. *Am J Clin Nutr.* 1984;39:129-135. doi: 10.1093/ajcn/39.1.129 PMID: 6691287
3. Bhargava SK, Sachdev HS, Fall CH, Osmond C, Lakshmy R, Barker DJ, et al.: Relation of serial changes in childhood body-mass index to impaired glucose tolerance in young adulthood. *N Engl J Med.* 2004;350:865-875. doi: 10.1056/NEJMoa035698 PMID: 14985484
4. Eriksson JG: Epidemiology, genes and the environment: lessons learned from the Helsinki Birth Cohort Study. *J Intern Med.* 2007;261:418-425. doi: 10.1111/j.1365-2796.2007.01798.x PMID: 17444881
5. Koyama S, Ichikawa G, Kojima M, Shimura N, Sairenchi T, Arisaka O: Adiposity rebound and the development of metabolic syndrome. *Pediatrics.* 2014;133:e114-119. doi: 10.1542/peds.2013-0966 PMID: 24366997
6. Prokopec M, Bellisle F: Adiposity in Czech children followed from 1 month of age to adulthood: analysis of individual BMI patterns. *Ann Hum Biol.* 1993;20:517-525. doi: 10.1080/03014469300002922 PMID: 8257077
7. Whitaker RC, Pepe MS, Wright JA, Seidel KD, Dietz WH: Early adiposity rebound and the risk of adult obesity. *Pediatrics.* 1998;101:E5. doi:10.1542/peds.101.3.e5 PMID: 9481024
8. Mo-Suwan L, McNeil E, Sangsupawanich P, Chittchang U, Choprapawon C: Adiposity rebound from three to six years of age was associated with a higher insulin resistance risk at eight-and-a-half years in a birth cohort study. *Acta Paediatr.* 2017;106:128-134. doi:

10.1111/apa.13639 PMID: 27759899

9. Barker DJ, Osmond C, Forsen TJ, Kajantie E, Eriksson JG: Trajectories of growth among children who have coronary events as adults. *N Engl J Med.* 2005;353:1802-1809. doi: 10.1056/NEJMoa044160 PMID: 16251536

10. Maeyama K, Morioka I, Iwatani S, Fukushima S, Kurokawa D, Yamana K, et al.: Gestational age-dependency of height and body mass index trajectories during the first 3 years in Japanese small-for-gestational age children. *Sci Rep.* 2016;6:38659. doi: 10.1038/srep38659 PMID: 27934914

11. Kang MJ: The adiposity rebound in the 21st century children: meaning for what? *Korean J Pediatr.* 2018;61:375-380. doi: 10.3345/kjp.2018.07227 PMID: 30585060

12. Vignerova J, Humenikova L, Brabec M, Riedlova J, Blaha P: Long-term changes in body weight, BMI, and adiposity rebound among children and adolescents in the Czech Republic. *Econ Hum Biol.* 2007;5:409-425. doi: 10.1016/j.ehb.2007.07.003 PMID: 17766203

13. Cheol Seong S, Kim YY, Khang YH, Heon Park J, Kang HJ, Lee H, et al.: Data Resource Profile: The National Health Information Database of the National Health Insurance Service in South Korea. *Int J Epidemiol.* 2017;46:799-800. doi: 10.1093/ije/dyw253 PMID: 27794523

14. Fenton TR: A new growth chart for preterm babies: Babson and Benda's chart updated with recent data and a new format. *BMC Pediatr.* 2003;3:13. doi: 10.1186/1471-2431-3-13 PMID: 14678563

15. Gillman MW: Early infancy - a critical period for development of obesity. *J Dev Orig Health Dis.* 2010;1:292-299. doi: 10.1017/s2040174410000358 PMID: 25141932

16. Kim JH, Yun S, Hwang SS, Shim JO, Chae HW, Lee YJ, et al.: The 2017 Korean National Growth Charts for children and adolescents: development, improvement, and prospects. *Korean J Pediatr.* 2018;61:135-149. doi: 10.3345/kjp.2018.61.5.135 PMID:

29853938

17. Kowal M, Kryst L, Woronkiewicz A, Sobiecki J, Brudecki J, Zarow R: Long-term changes in BMI and adiposity rebound among girls from Krakow (Poland) over the last 30 years (from 1983 to 2010). *Am J Hum Biol.* 2013;25:300-306. doi: 10.1002/ajhb.22359 PMID: 23348802

18. Kowal M, Kryst L, Woronkiewicz A, Brudecki J, Sobiecki J: Time trends in BMI, body fatness, and adiposity rebound among boys from Krakow (Poland) from 1983 to 2010. *Am J Hum Biol.* 2015;27:646-653. doi: 10.1002/ajhb.22704 PMID: 25754811

19. Min J, Wen X, Xue H, Wang Y: Ethnic disparities in childhood BMI trajectories and obesity and potential causes among 29,250 US children: Findings from the Early Childhood Longitudinal Study-Birth and Kindergarten Cohorts. *Int J Obes (Lond).* 2018;42:1661-1670. doi: 10.1038/s41366-018-0091-4 PMID: 29907845

20. Johnson W, Soloway LE, Erickson D, Choh AC, Lee M, Chumlea WC, et al.: A changing pattern of childhood BMI growth during the 20th century: 70 y of data from the Fels Longitudinal Study. *Am J Clin Nutr.* 2012;95:1136-1143. doi: 10.3945/ajcn.111.022269 PMID: 22418089

21. Styne DM, Arslanian SA, Connor EL, Farooqi IS, Murad MH, Silverstein JH, et al.: Pediatric Obesity-Assessment, Treatment, and Prevention: An Endocrine Society Clinical Practice Guideline. *J Clin Endocrinol Metab.* 2017;102:709-757. doi: 10.1210/jc.2016-2573 PMID: 28359099

22. Luo ZC, Cheung YB, He Q, Albertsson-Wikland K, Karlberg J: Growth in early life and its relation to pubertal growth. *Epidemiology.* 2003;14:65-73. doi: 10.1097/01.ede.0000038561.20357.e4 PMID: 12500048

23. Andersen LG, Angquist L, Eriksson JG, Forsen T, Gamborg M, Osmond C, et al.: Birth weight, childhood body mass index and risk of coronary heart disease in adults: combined



historical cohort studies. *PLoS One*. 2010;5:e14126. doi: 10.1371/journal.pone.0014126  
PMID: 21124730

24. Cho WK, Suh BK: Catch-up growth and catch-up fat in children born small for gestational age. *Korean J Pediatr*. 2016;59:1-7. doi: 10.3345/kjp.2016.59.1.1 PMID: 26893597

25. de Wilde JA, Middelkoop B, Verkerk PH: Tracking of thinness and overweight in children of Dutch, Turkish, Moroccan and South Asian descent from 3 through 15 years of age: a historical cohort study. *Int J Obes (Lond)*. 2018;42:1230-1238. doi: 10.1038/s41366-018-0135-9 PMID: 29892040

26. Gardner DS, Hosking J, Metcalf BS, Jeffery AN, Voss LD, Wilkin TJ: Contribution of early weight gain to childhood overweight and metabolic health: a longitudinal study (EarlyBird 36). *Pediatrics*. 2009;123:e67-73. doi: 10.1542/peds.2008-1292 PMID: 19117849

27. Williams SM, Goulding A: Patterns of growth associated with the timing of adiposity rebound. *Obesity (Silver Spring)*. 2009;17:335-341. doi: 10.1038/oby.2008.547 PMID: 19057527

28. Rolland-Cachera MF, Deheeger M, Guilloud-Bataille M, Avons P, Patois E, Sempe M: Tracking the development of adiposity from one month of age to adulthood. *Ann Hum Biol*. 1987;14:219-229. doi: 10.1080/03014468700008991 PMID: 3662424

29. Monteiro PO, Victora CG: Rapid growth in infancy and childhood and obesity in later life--a systematic review. *Obes Rev*. 2005;6:143-154. doi: 10.1111/j.1467-789X.2005.00183.x PMID: 15836465

30. Botton J, Heude B, Maccario J, Ducimetiere P, Charles MA: Postnatal weight and height growth velocities at different ages between birth and 5 y and body composition in adolescent boys and girls. *Am J Clin Nutr*. 2008;87:1760-1768. doi: 10.1093/ajcn/87.6.1760 PMID: 18541566

31. Dorosty AR, Emmett PM, Cowin S, Reilly JJ: Factors associated with early adiposity rebound. ALSPAC Study Team. *Pediatrics*. 2000;105:1115-1118. doi: 10.1542/peds.105.5.1115 PMID: 10790472
32. Ip EH, Marshall SA, Saldana S, Skelton JA, Suerken CK, Arcury TA, et al.: Determinants of Adiposity Rebound Timing in Children. *J Pediatr*. 2017;184:151-156.e152. doi: 10.1016/j.jpeds.2017.01.051 PMID: 28242030
33. Dietz WH, Jr., Gortmaker SL: Do we fatten our children at the television set? Obesity and television viewing in children and adolescents. *Pediatrics*. 1985;75:807-812. PMID: 3873060
34. Scaglioni S, Agostoni C, Notaris RD, Radaelli G, Radice N, Valenti M, et al.: Early macronutrient intake and overweight at five years of age. *Int J Obes Relat Metab Disord*. 2000;24:777-781. doi: 10.1038/sj.ijo.0801225 PMID: 10878686
35. Kroke A, Hahn S, Buyken AE, Liese AD: A comparative evaluation of two different approaches to estimating age at adiposity rebound. *Int J Obes (Lond)*. 2006;30:261-266. doi: 10.1038/sj.ijo.0803143 PMID: 16231016
36. Siervogel RM, Roche AF, Guo SM, Mukherjee D, Chumlea WC: Patterns of change in weight/stature<sup>2</sup> from 2 to 18 years: findings from long-term serial data for children in the Fels longitudinal growth study. *Int J Obes*. 1991;15:479-485. PMID: 1845371
37. Beyerlein A, Fahrmeir L, Mansmann U, Toschke AM: Alternative regression models to assess increase in childhood BMI. *BMC Med Res Methodol*. 2008;8:59. doi: 10.1186/1471-2288-8-59 PMID: 18778466
38. Hughes AR, Sherriff A, Ness AR, Reilly JJ: Timing of adiposity rebound and adiposity in adolescence. *Pediatrics*. 2014;134:e1354-1361. doi: 10.1542/peds.2014-1908 PMID: 25311600
39. Dietz WH: Critical periods in childhood for the development of obesity. *Am J Clin Nutr*. 1994;59:955-959. doi: 10.1093/ajcn/59.5.955 PMID: 8172099

# Late AR

bioRxiv preprint doi: <https://doi.org/10.1101/2020.04.23.057687>; this version posted April 23, 2020. The copyright holder for this preprint (which was not certified by peer review) is the author/funder, who has granted bioRxiv a license to display the preprint in perpetuity. It is made available under aCC-BY 4.0 International license.

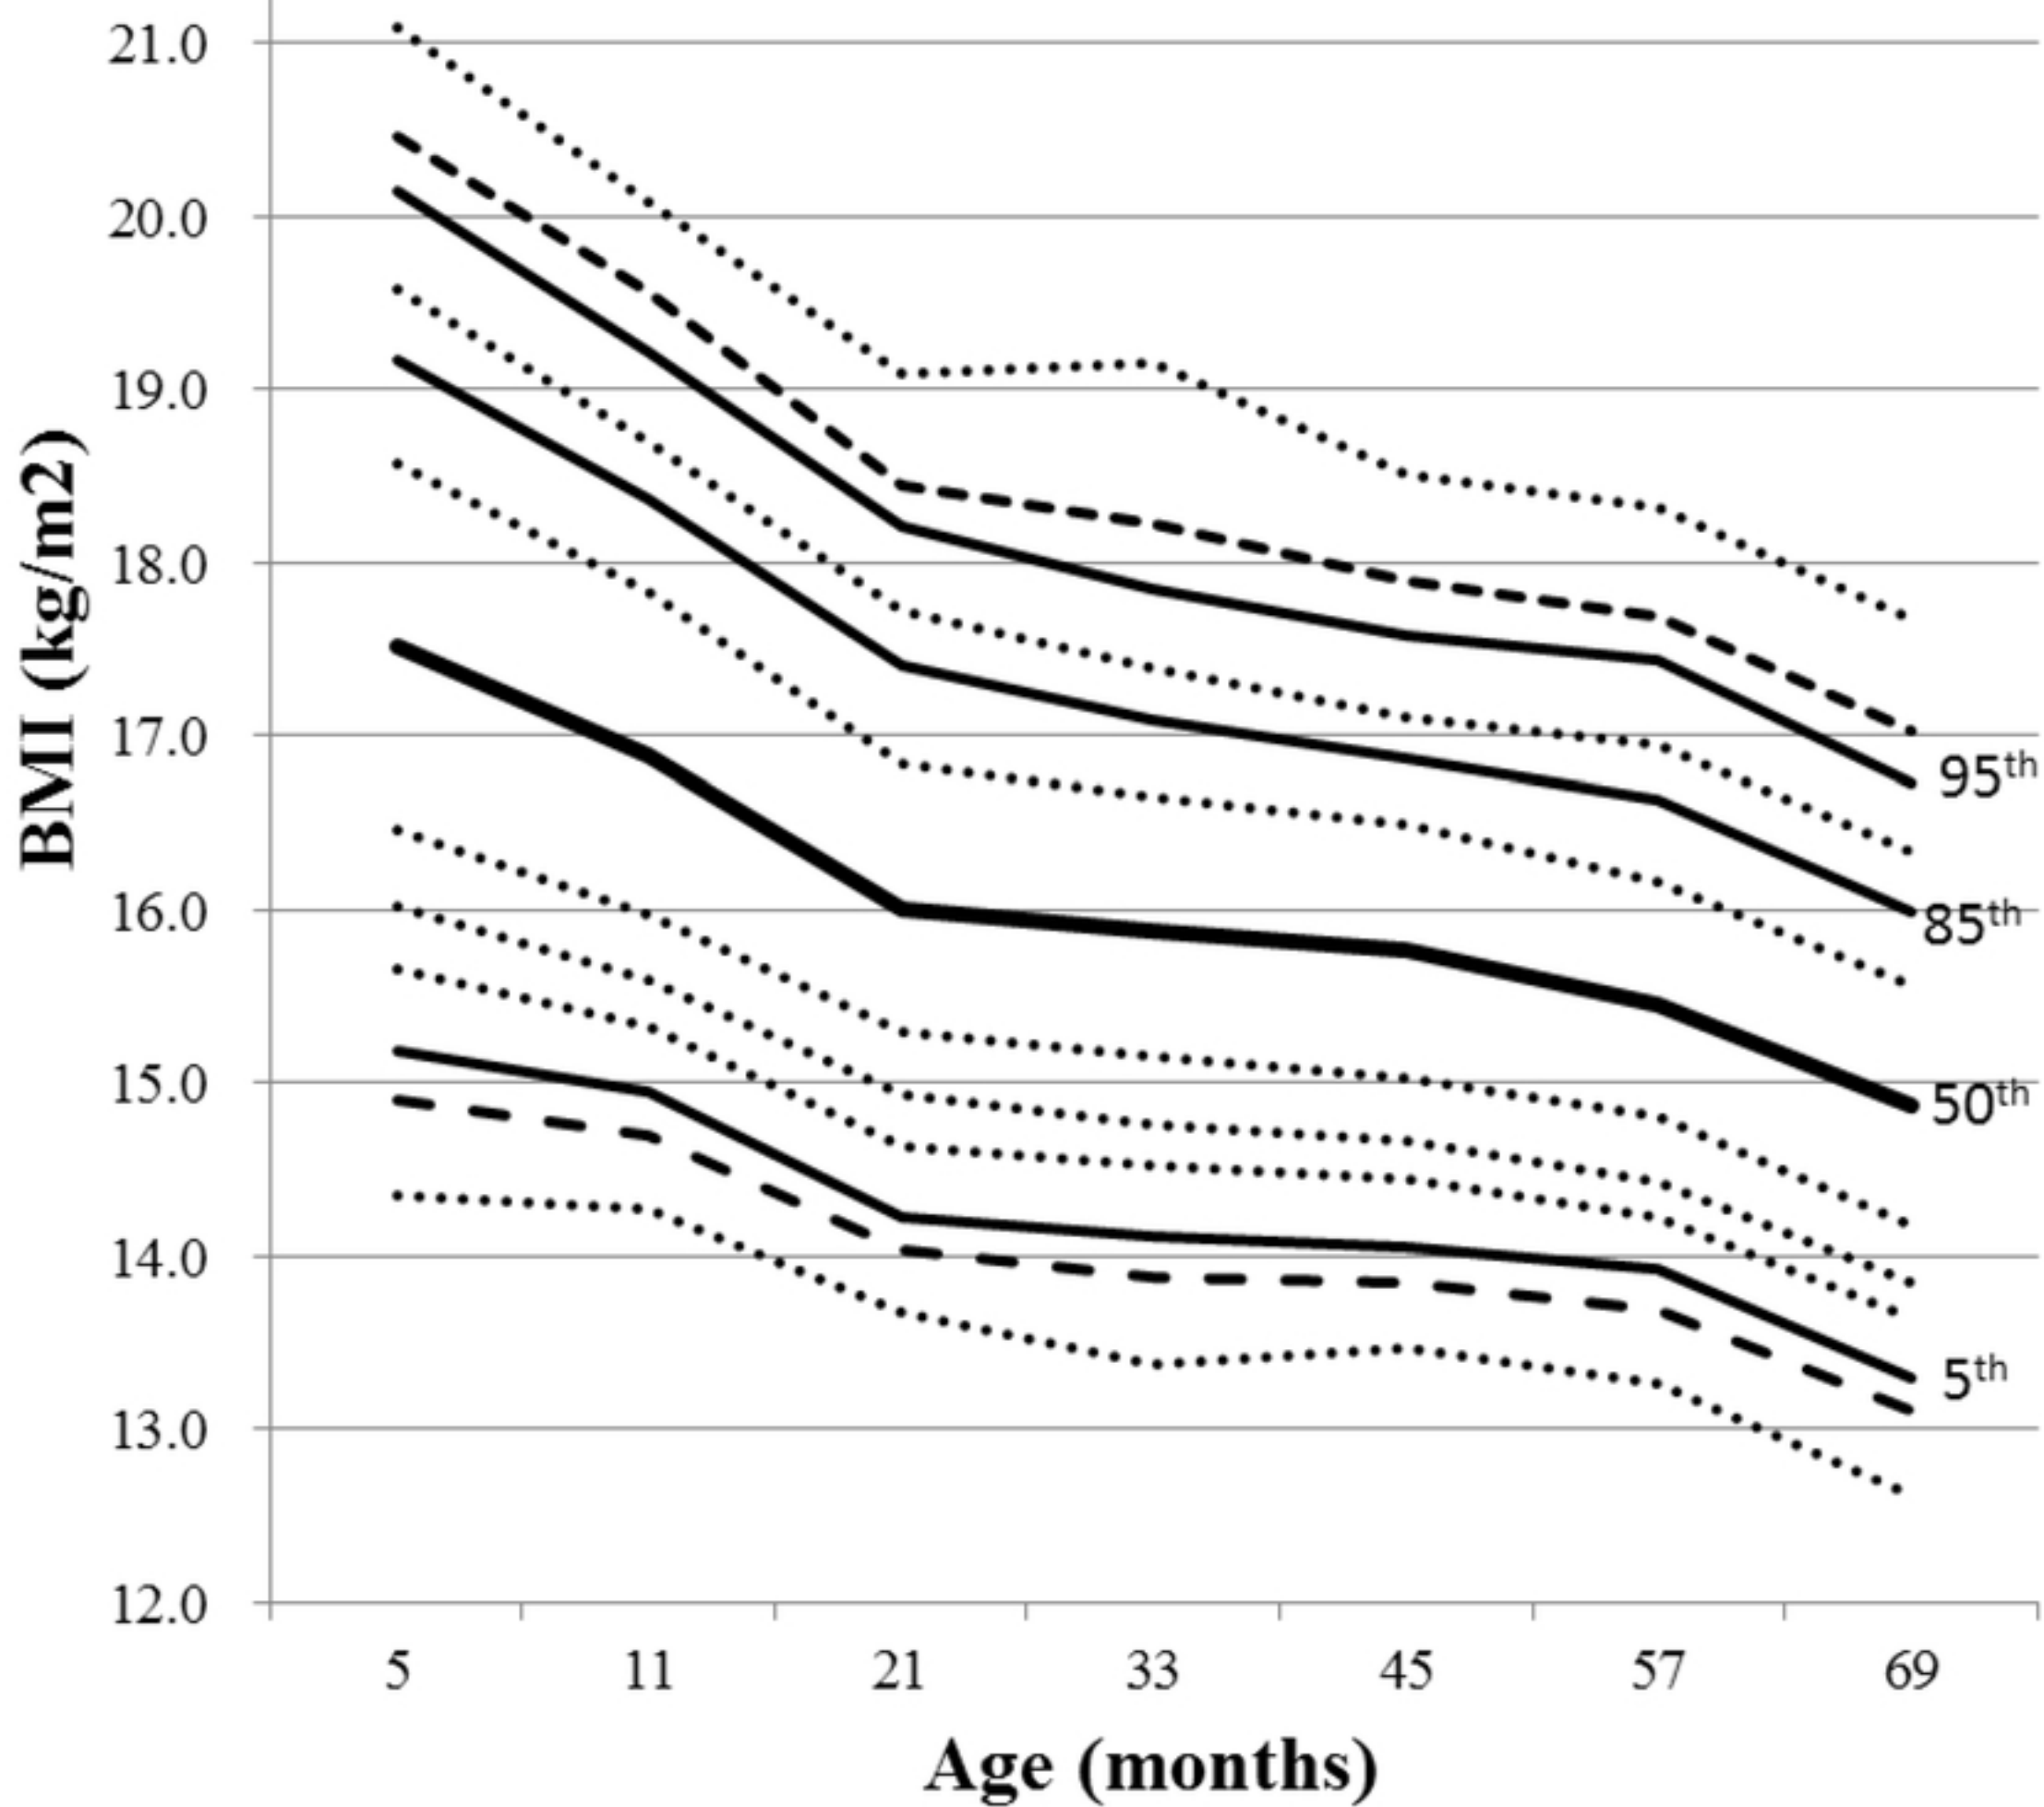

Fig 4F

| Initial number of data points = 357,414 |        |        |        |        |        |        |        |
|-----------------------------------------|--------|--------|--------|--------|--------|--------|--------|
| Exam                                    | I      | II     | III    | IV     | V      | VI     | VII    |
| Exam age (month)                        | 4-6    | 9-12   | 18-24  | 30-36  | 42-48  | 54-60  | 66-71  |
| Median age (month)                      | 5      | 11     | 21     | 33     | 45     | 57     | 69     |
| N of total subjects                     | 67,301 | 65,591 | 63,522 | 63,674 | 47,730 | 31,357 | 18,239 |

#### Inclusion criteria

$0.5 \text{ kg} \leq \text{birth Wt} \leq 5.0 \text{ kg}$

$\text{Birth Wt} < \text{Wt-I} < \text{Wt-II} < \text{Wt-III} < \text{Wt-IV} < \text{Wt-V} < \text{Wt-VI} < \text{Wt-VII} < +3 \text{ z-score of 69 months}$

$25 \text{ cm} < \text{Ht-I} < \text{Ht-II} < \text{Ht-III} < \text{Ht-IV} < \text{Ht-V} < \text{Ht-VI} < \text{Ht-VII} < +3 \text{ z-score of 69 months}$

At least 5 valid Ht, Wt, and BMI measurements during 7 times of health check-ups

| Final number of data points = 153,261 |        |        |        |        |        |        |        |
|---------------------------------------|--------|--------|--------|--------|--------|--------|--------|
| Exam                                  | I      | II     | III    | IV     | V      | VI     | VII    |
| N of total subjects                   | 27,143 | 23,983 | 24,662 | 24,867 | 24,804 | 17,590 | 10,212 |
| N of male                             | 13,841 | 12,226 | 12,554 | 12,721 | 12,631 | 8,944  | 5,191  |
| N of female                           | 13,302 | 11,757 | 12,108 | 12,146 | 12,173 | 8,646  | 5,021  |

Fig 1

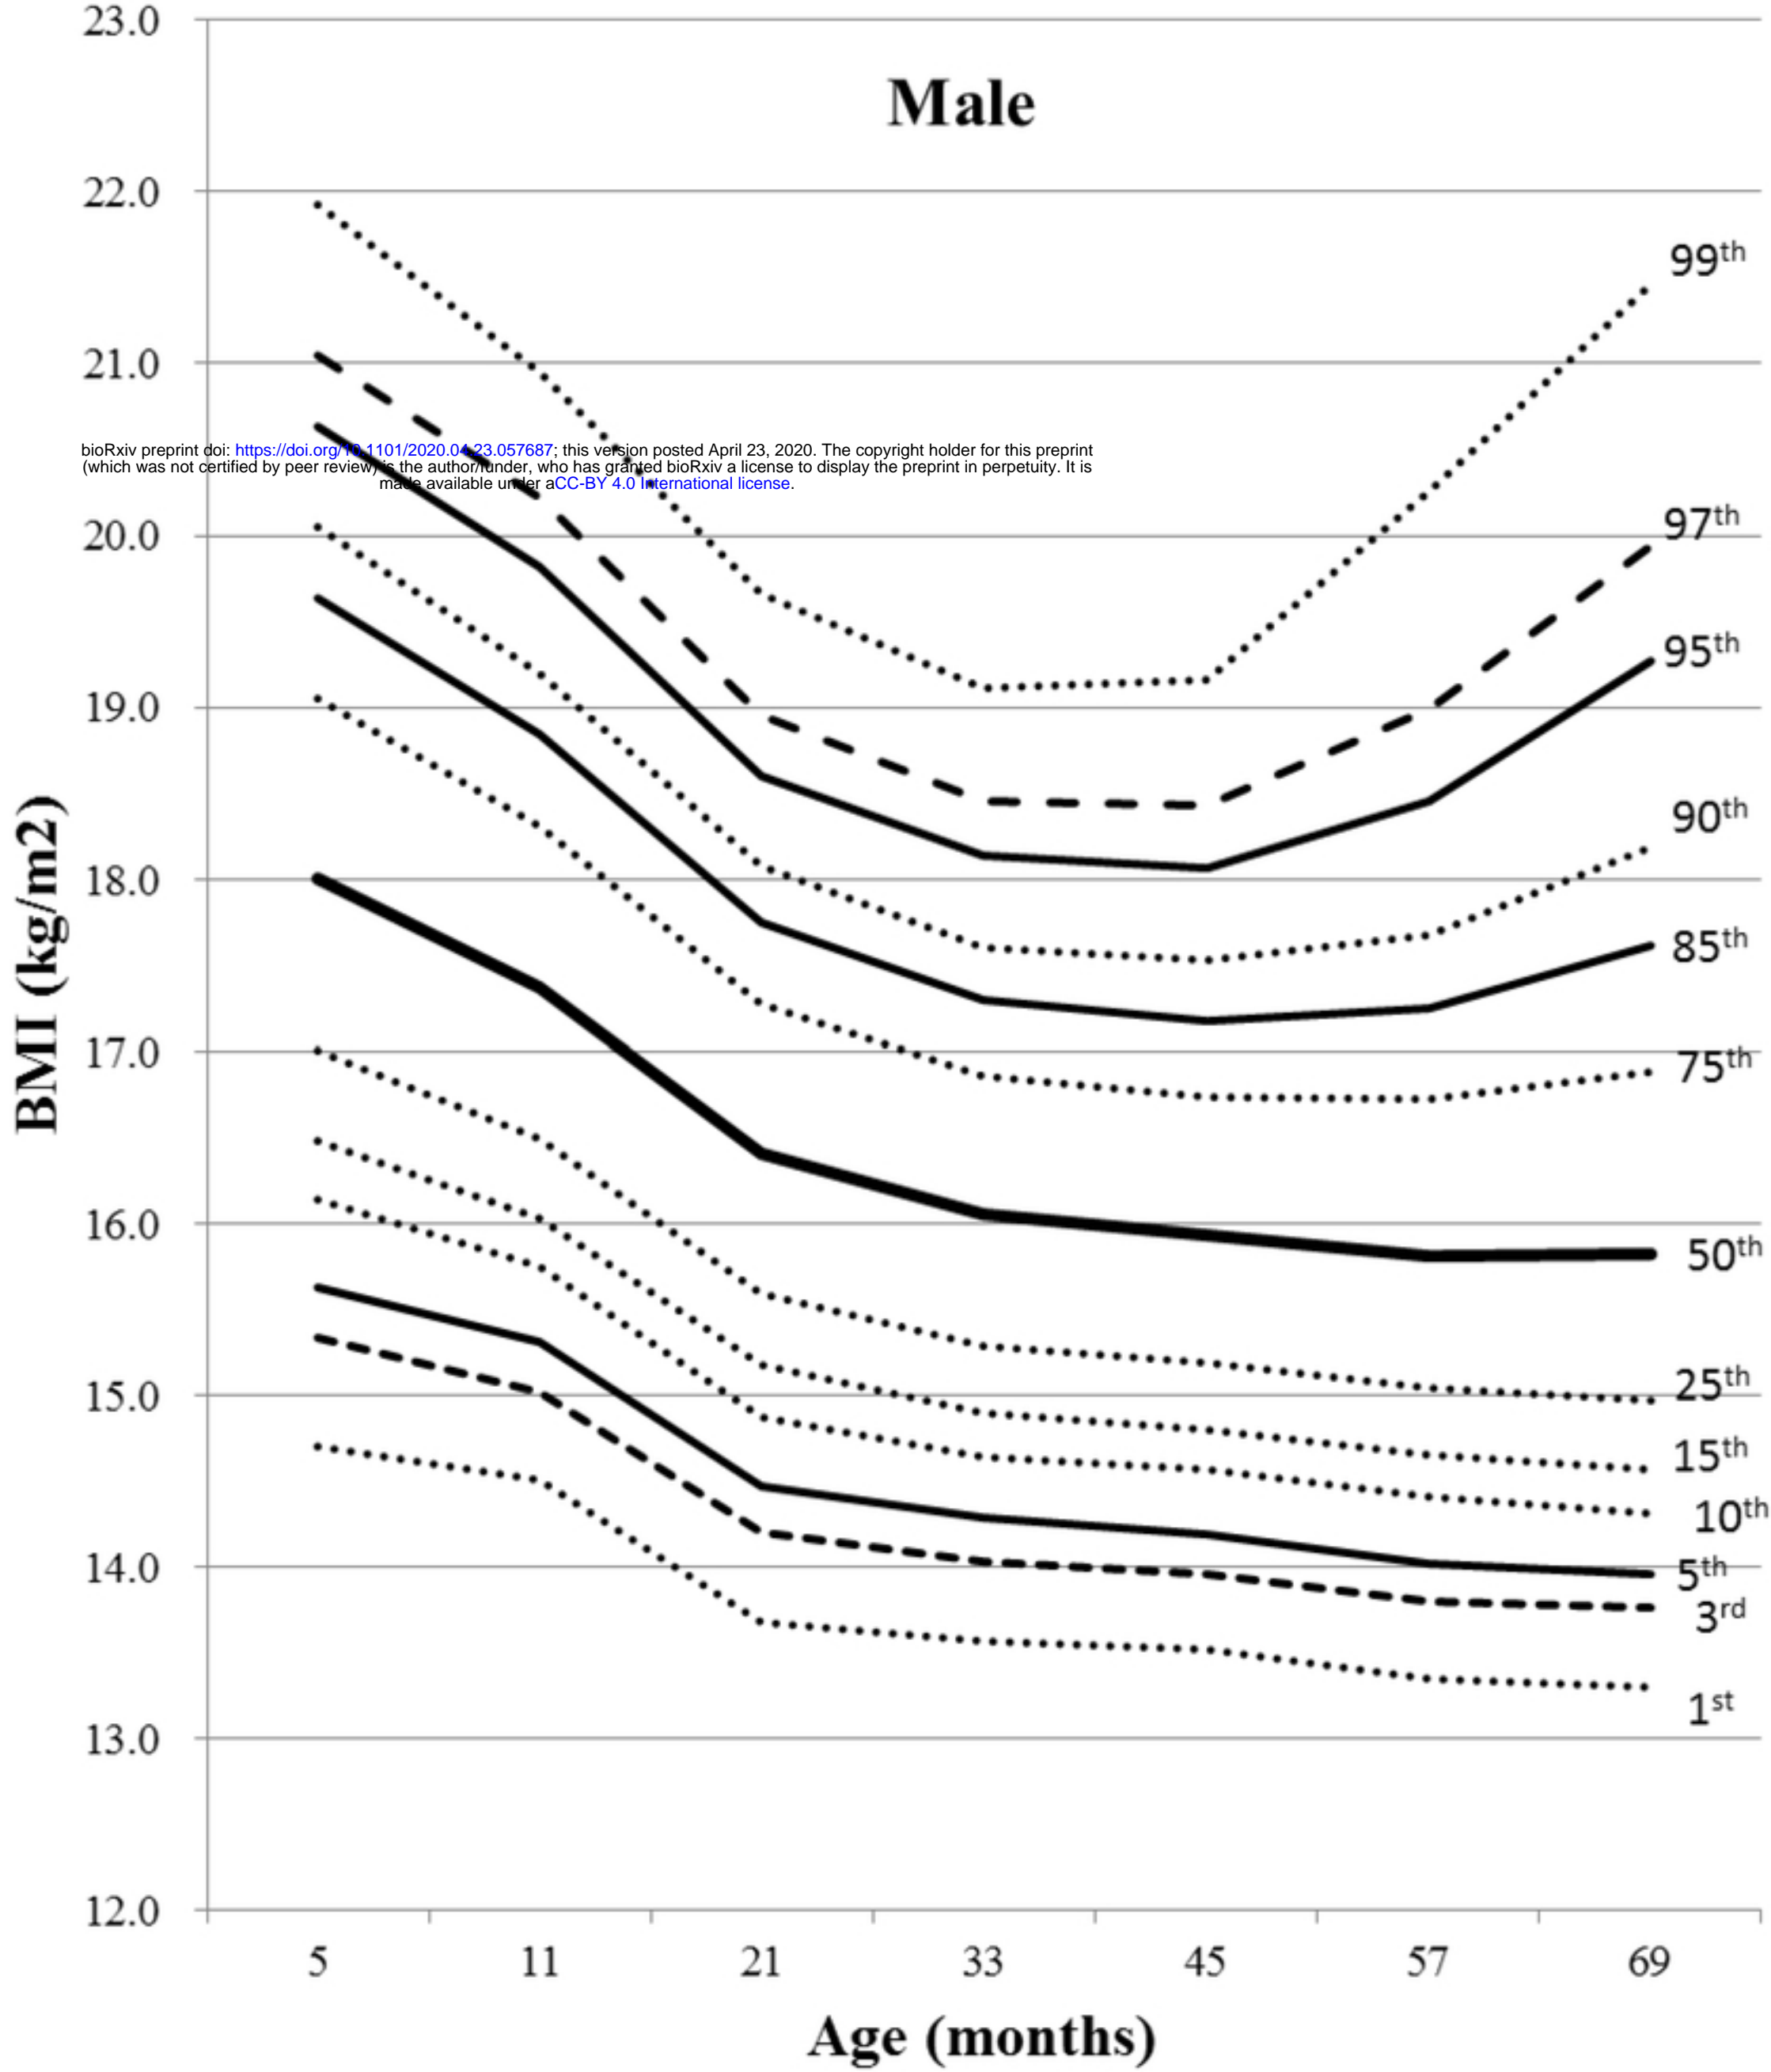

Fig 2A

# Female

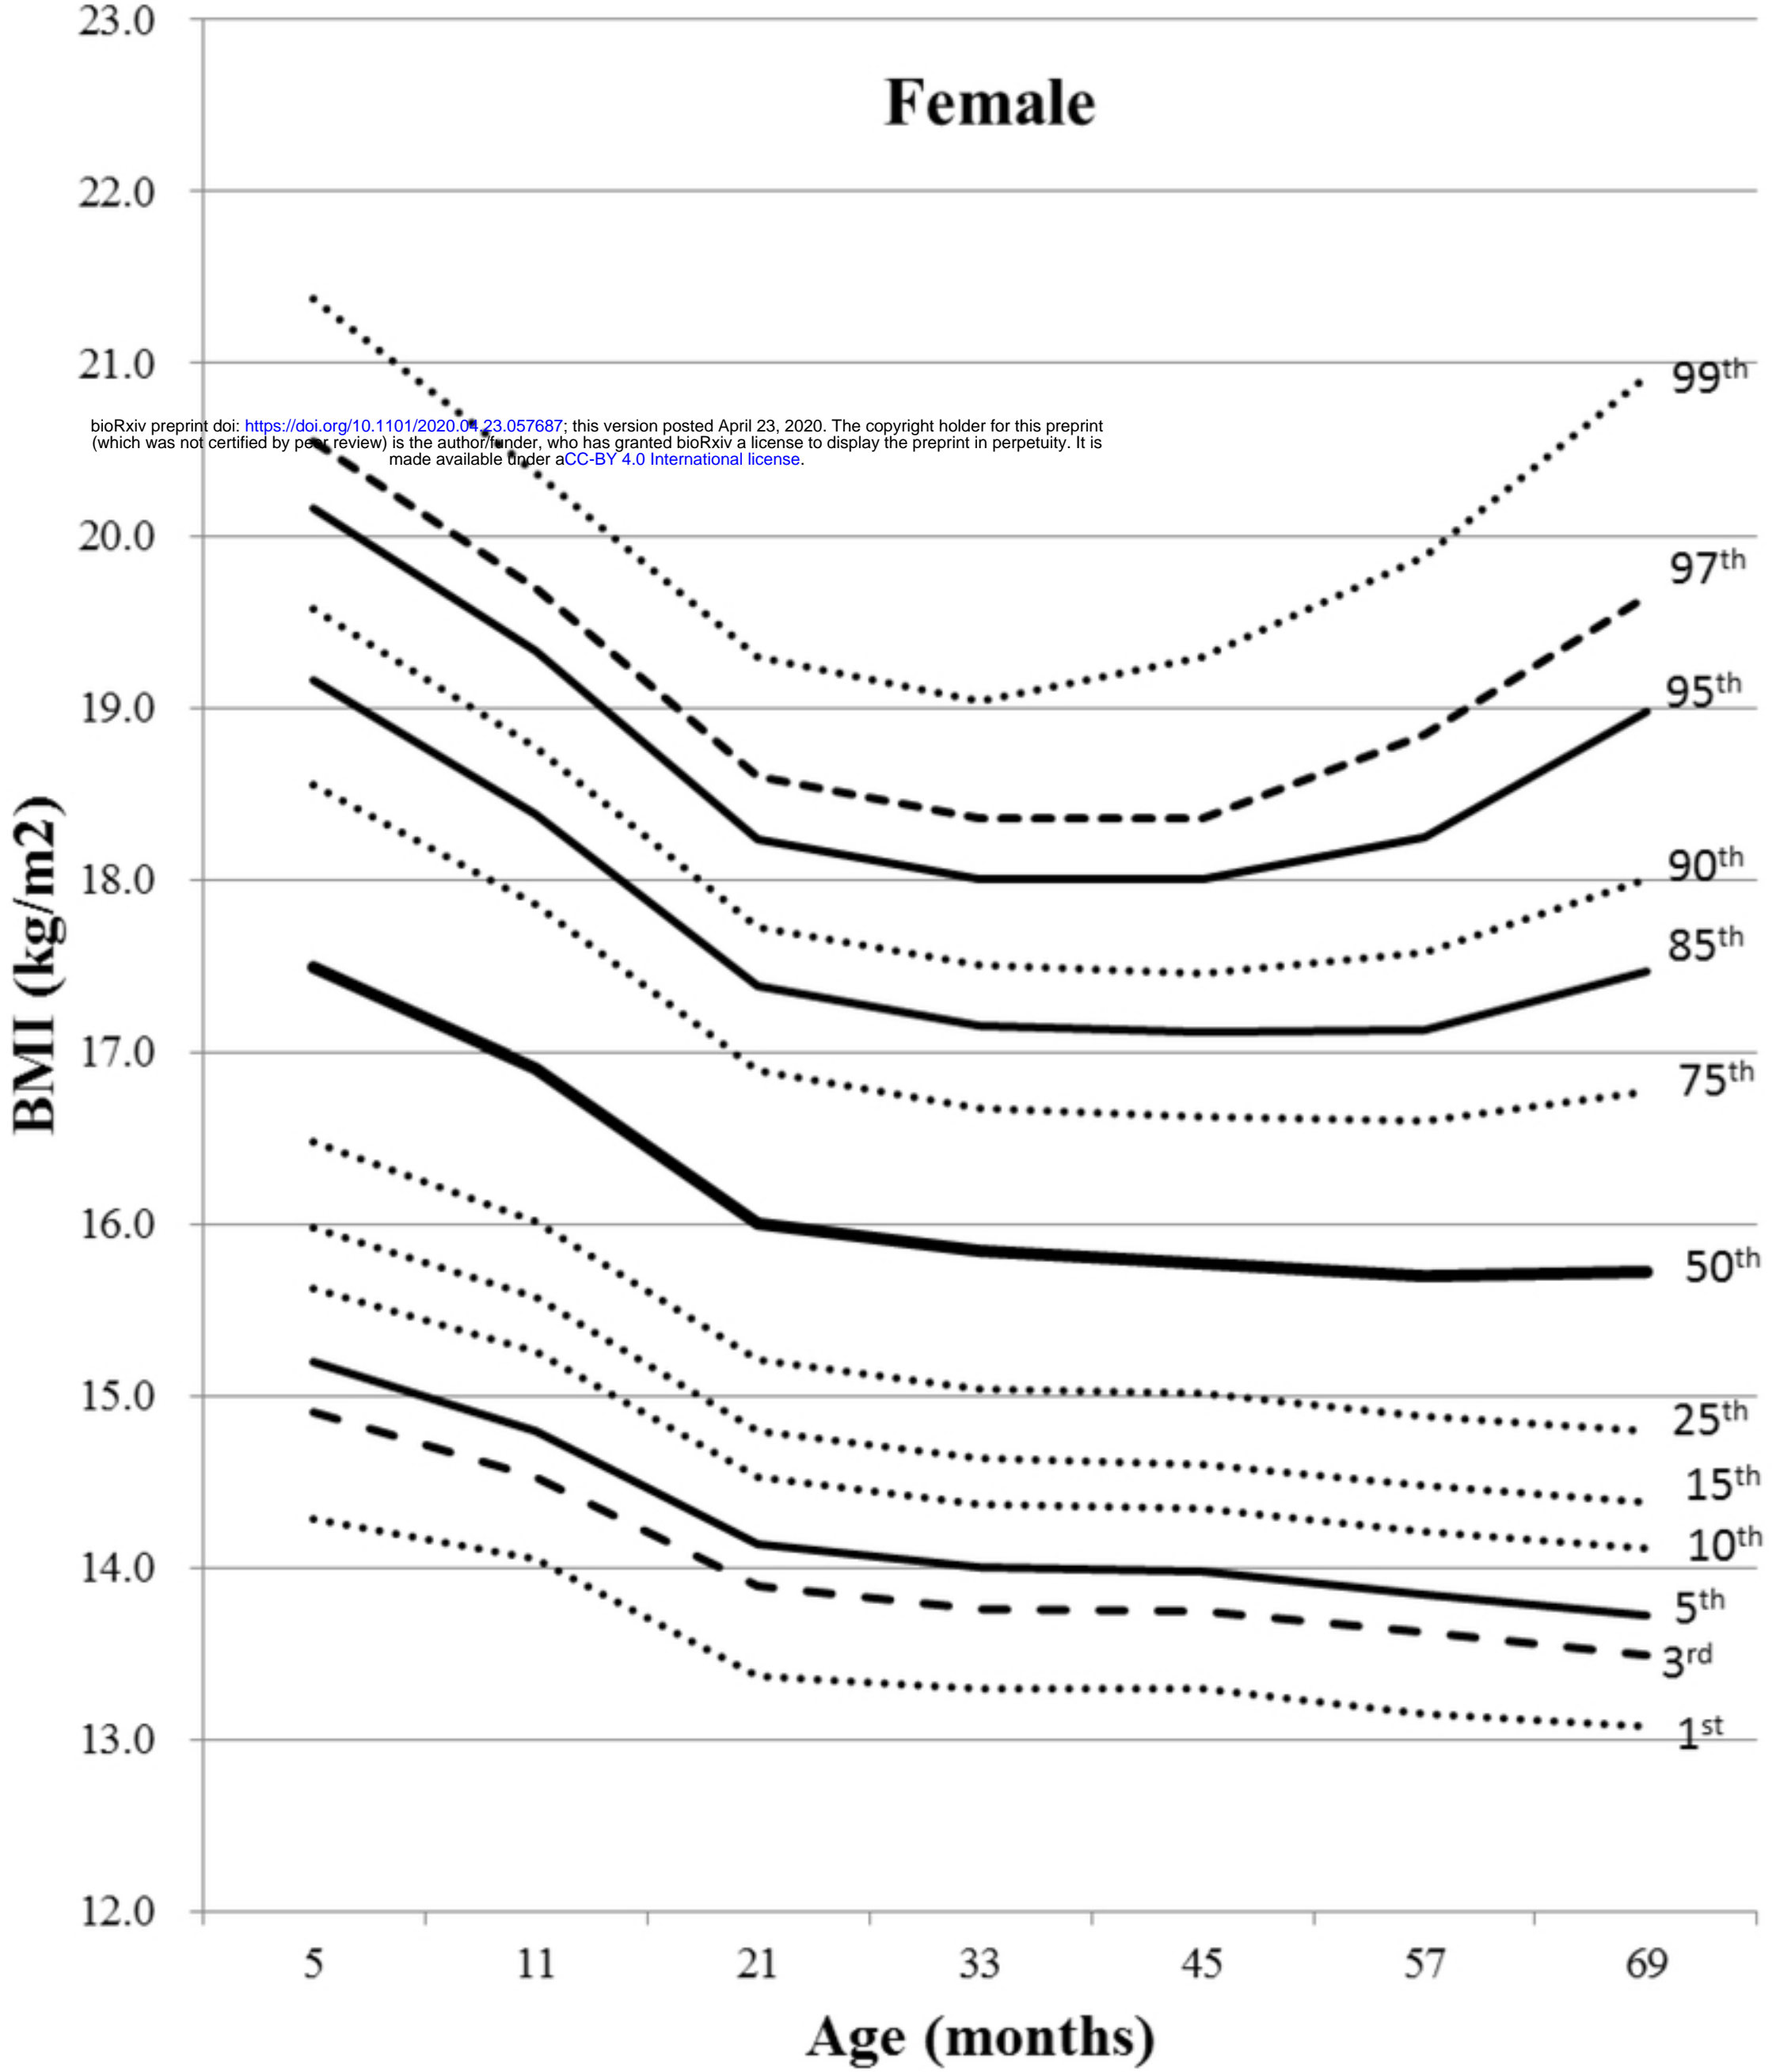

Fig 2B

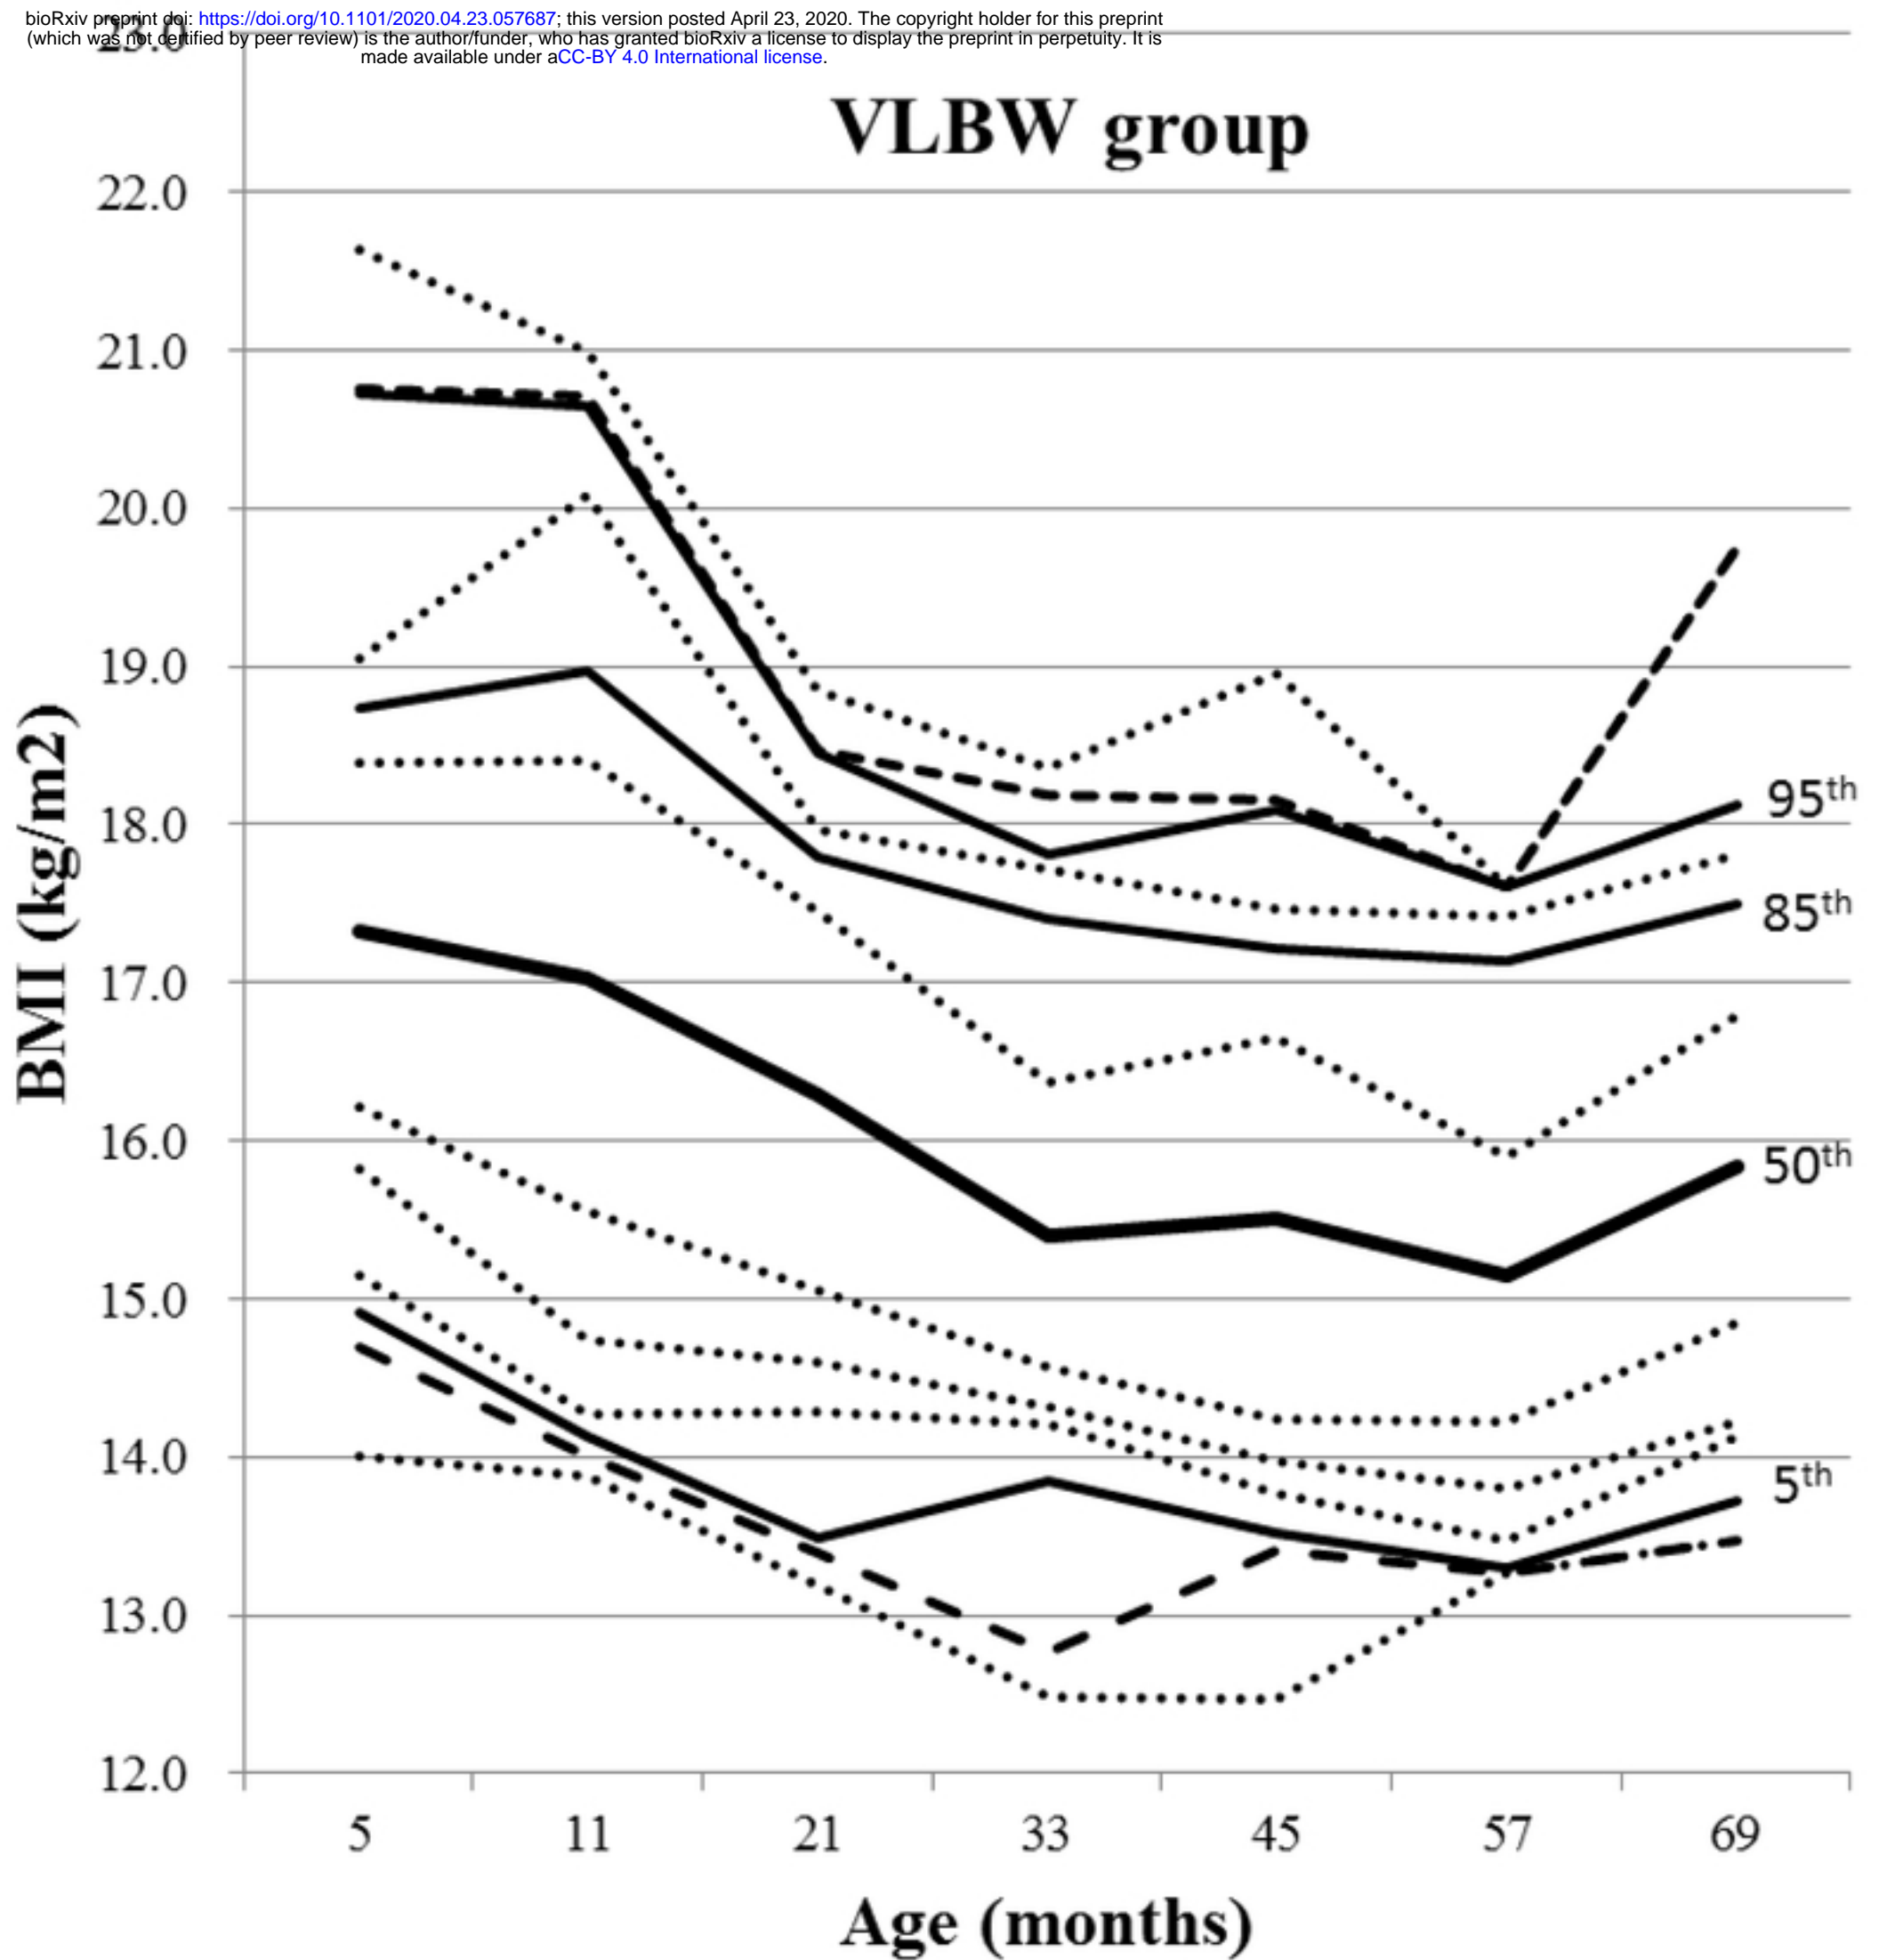

bioRxiv preprint doi: <https://doi.org/10.1101/2020.04.23.057687>; this version posted April 23, 2020. The copyright holder for this preprint (which was not certified by peer review) is the author/funder, who has granted bioRxiv a license to display the preprint in perpetuity. It is made available under aCC-BY 4.0 International license.

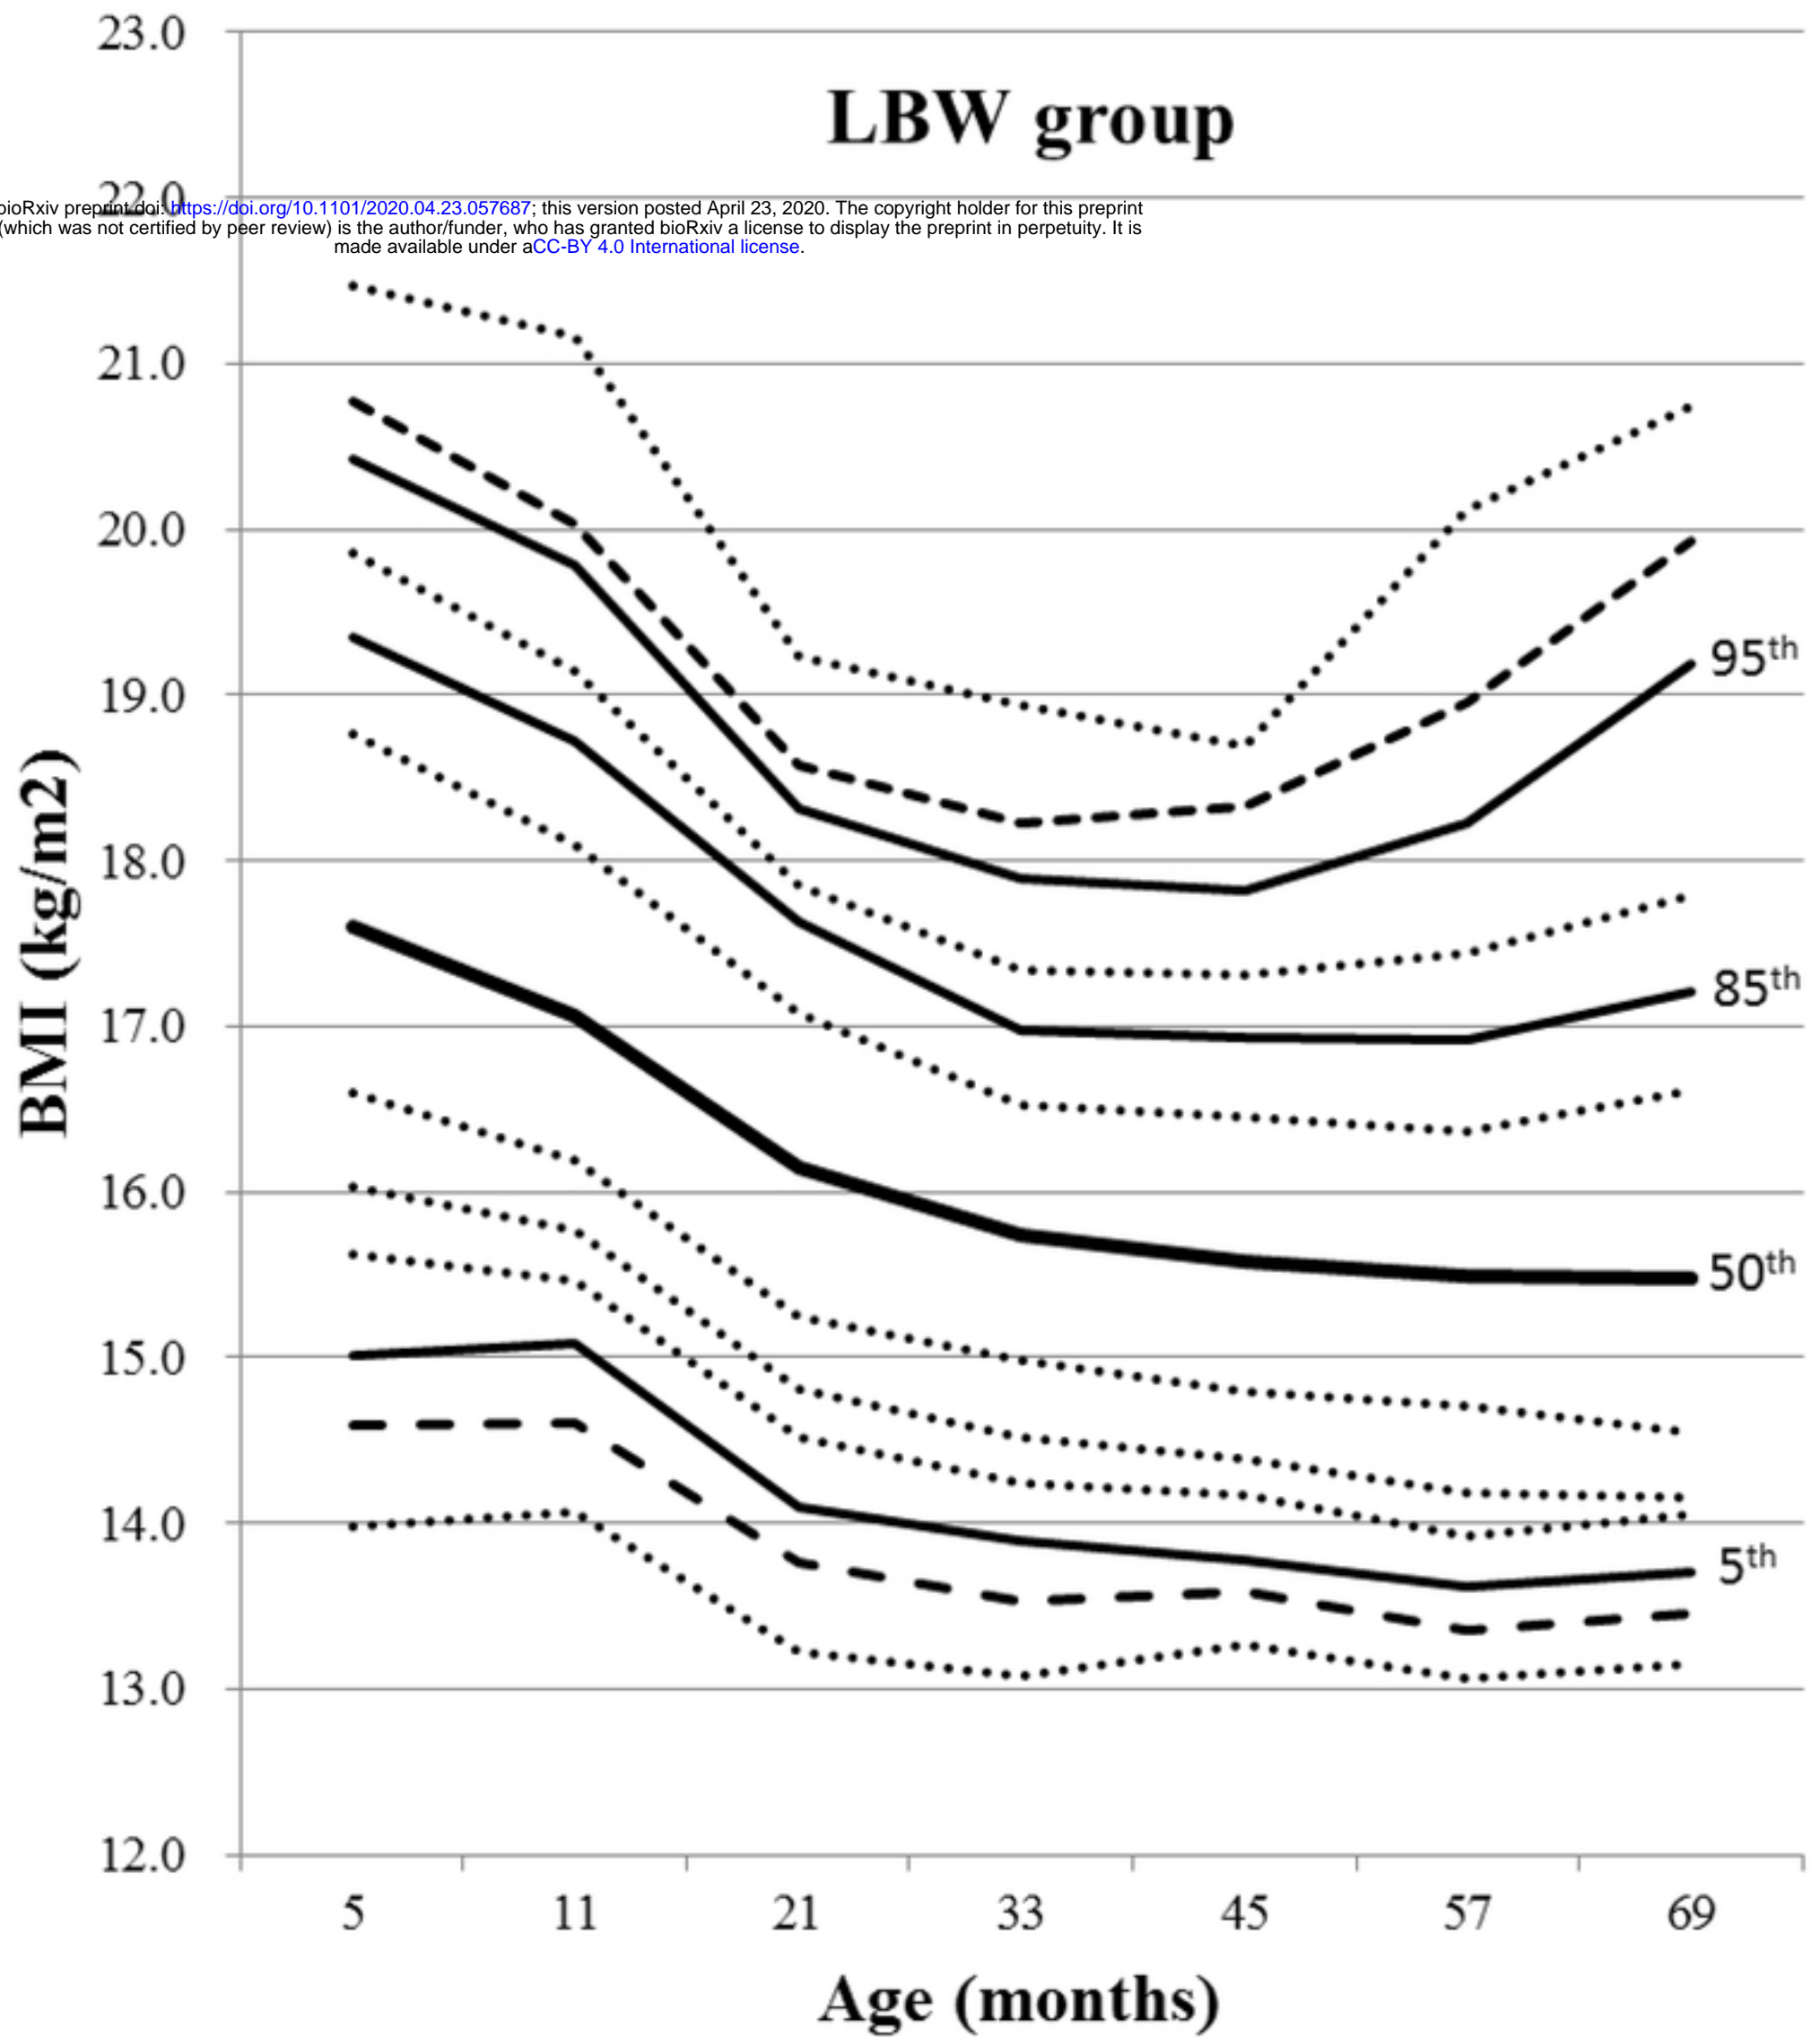

Fig 3B



# non-LBW group

bioRxiv preprint doi: <https://doi.org/10.1101/2020.04.23.057687>; this version posted April 23, 2020. The copyright holder for this preprint (which was not certified by peer review) is the author/funder, who has granted bioRxiv a license to display the preprint in perpetuity. It is made available under aCC-BY 4.0 International license.

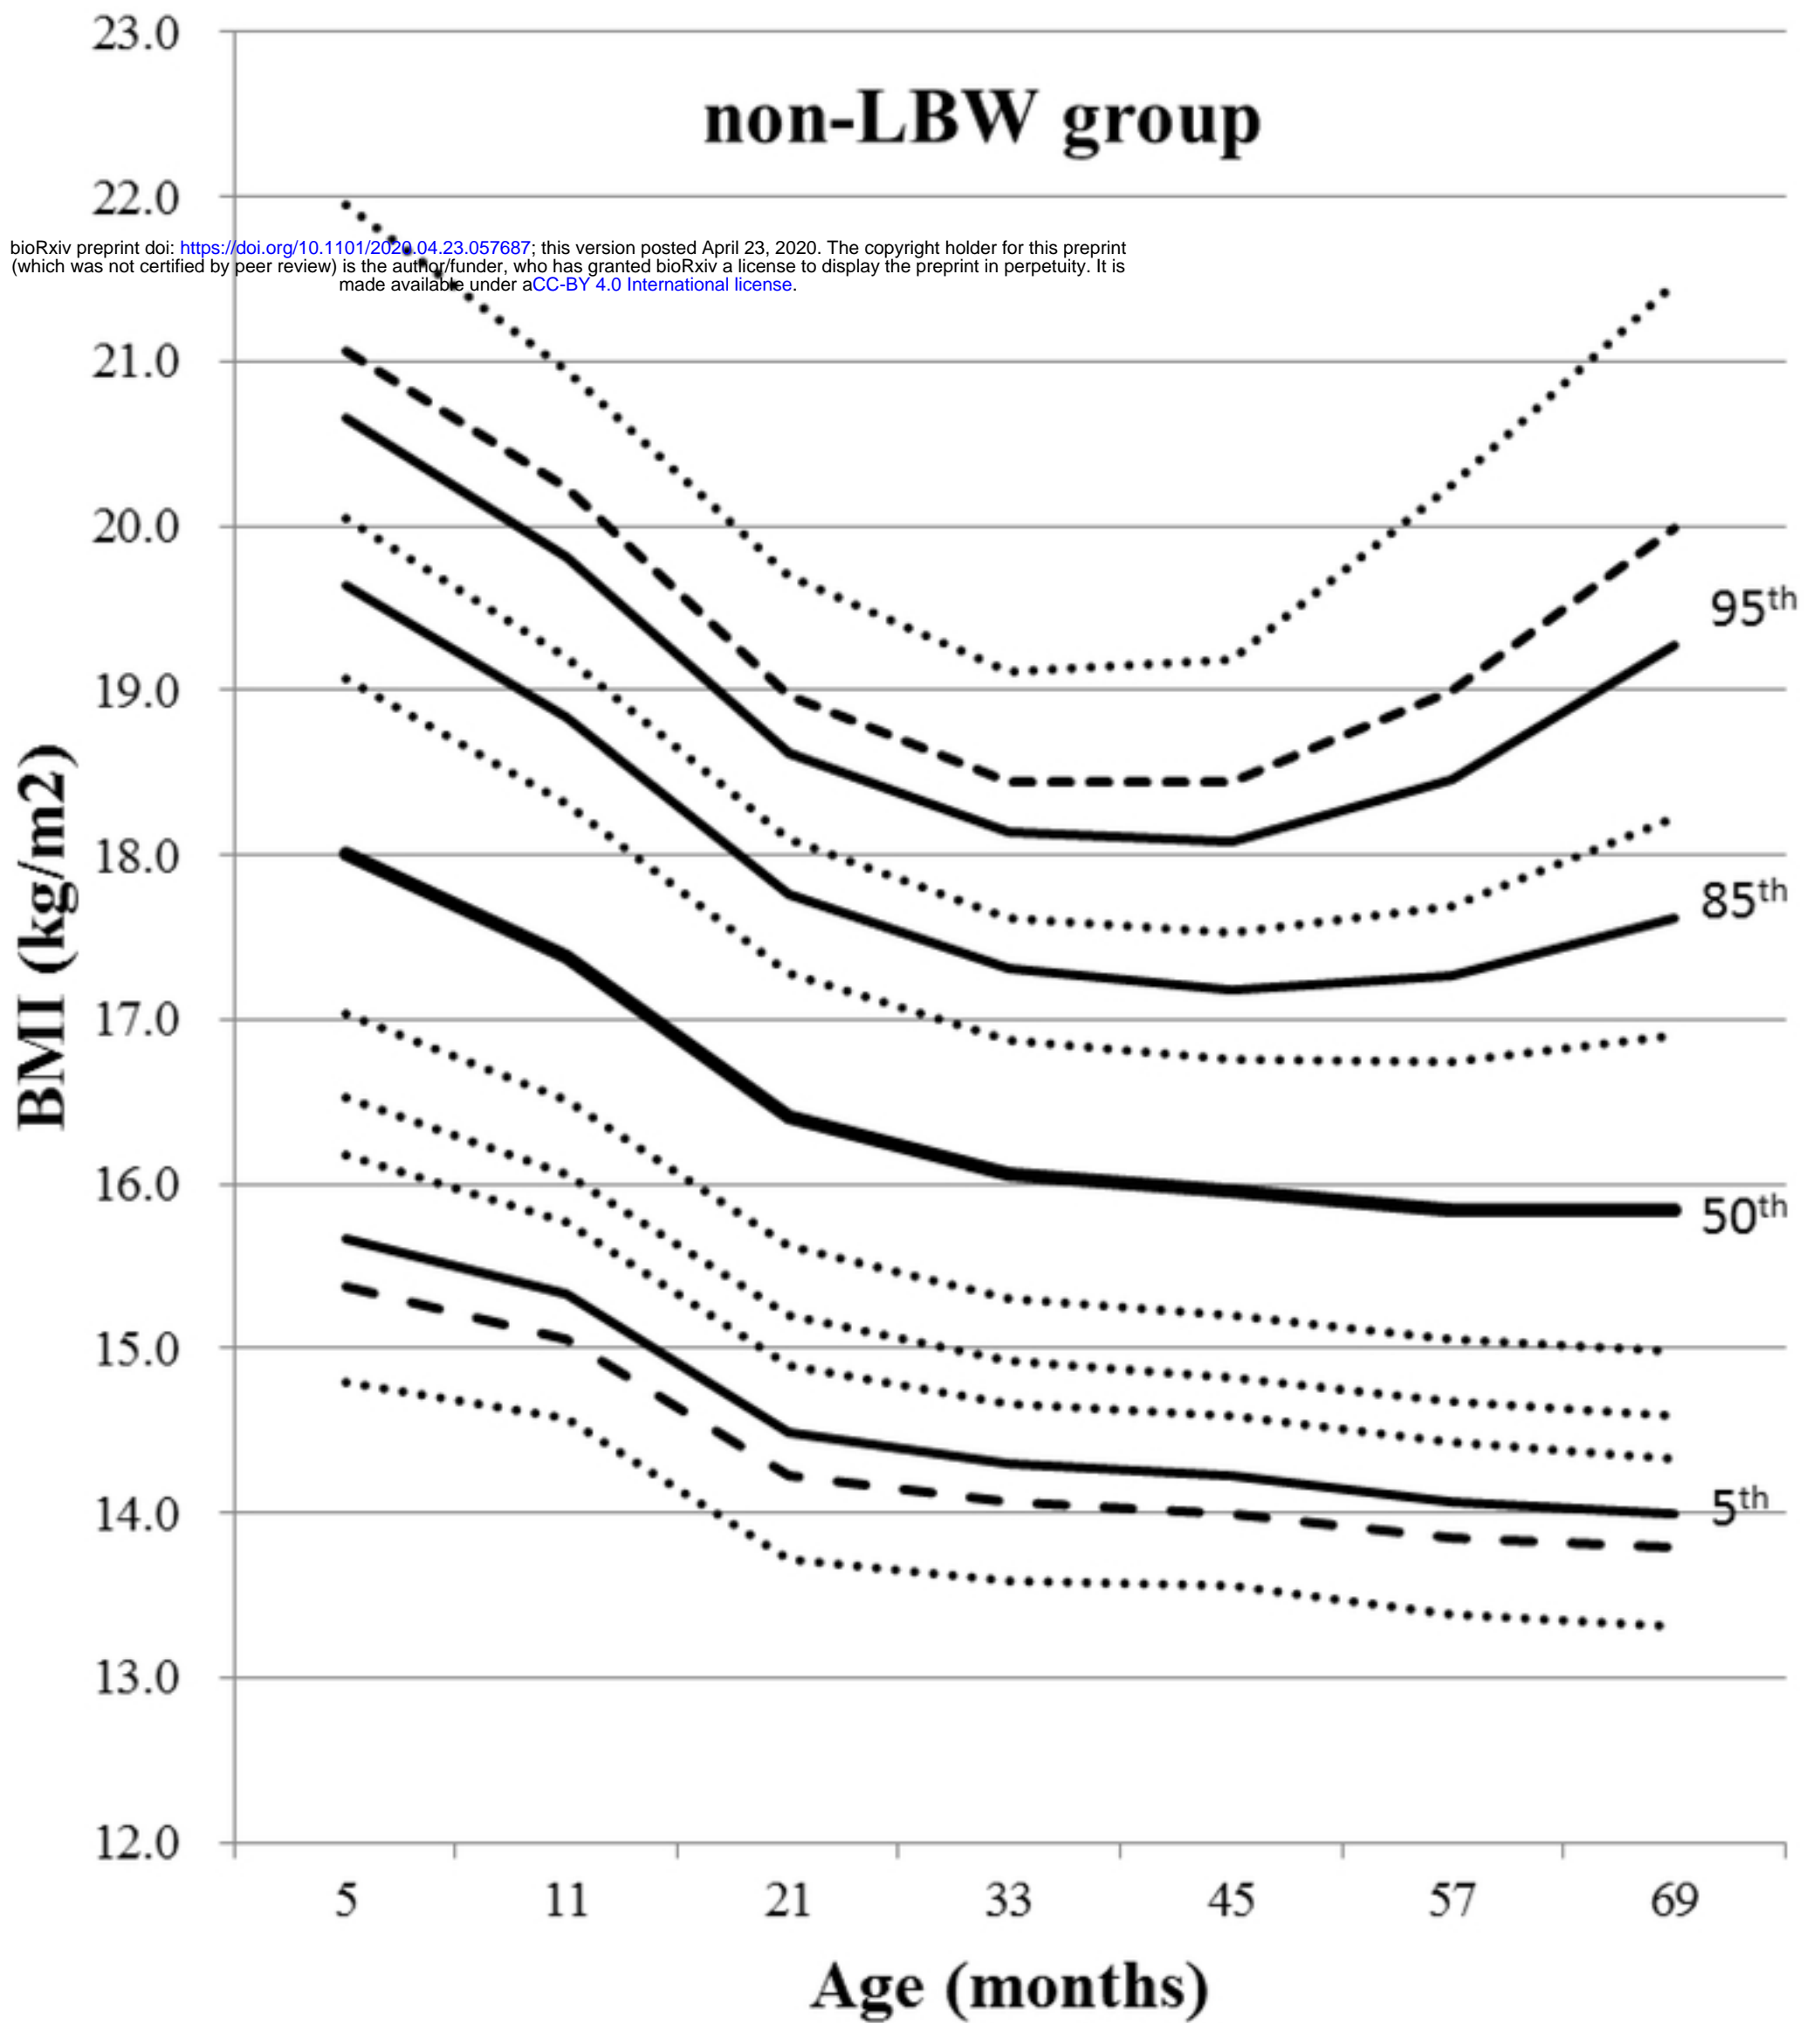

Fig 3C

bioRxiv preprint doi: <https://doi.org/10.1101/2020.04.23.057687>; this version posted April 23, 2020. The copyright holder for this preprint (which was not certified by peer review) is the author/funder, who has granted bioRxiv a license to display the preprint in perpetuity. It is made available under aCC-BY 4.0 International license.

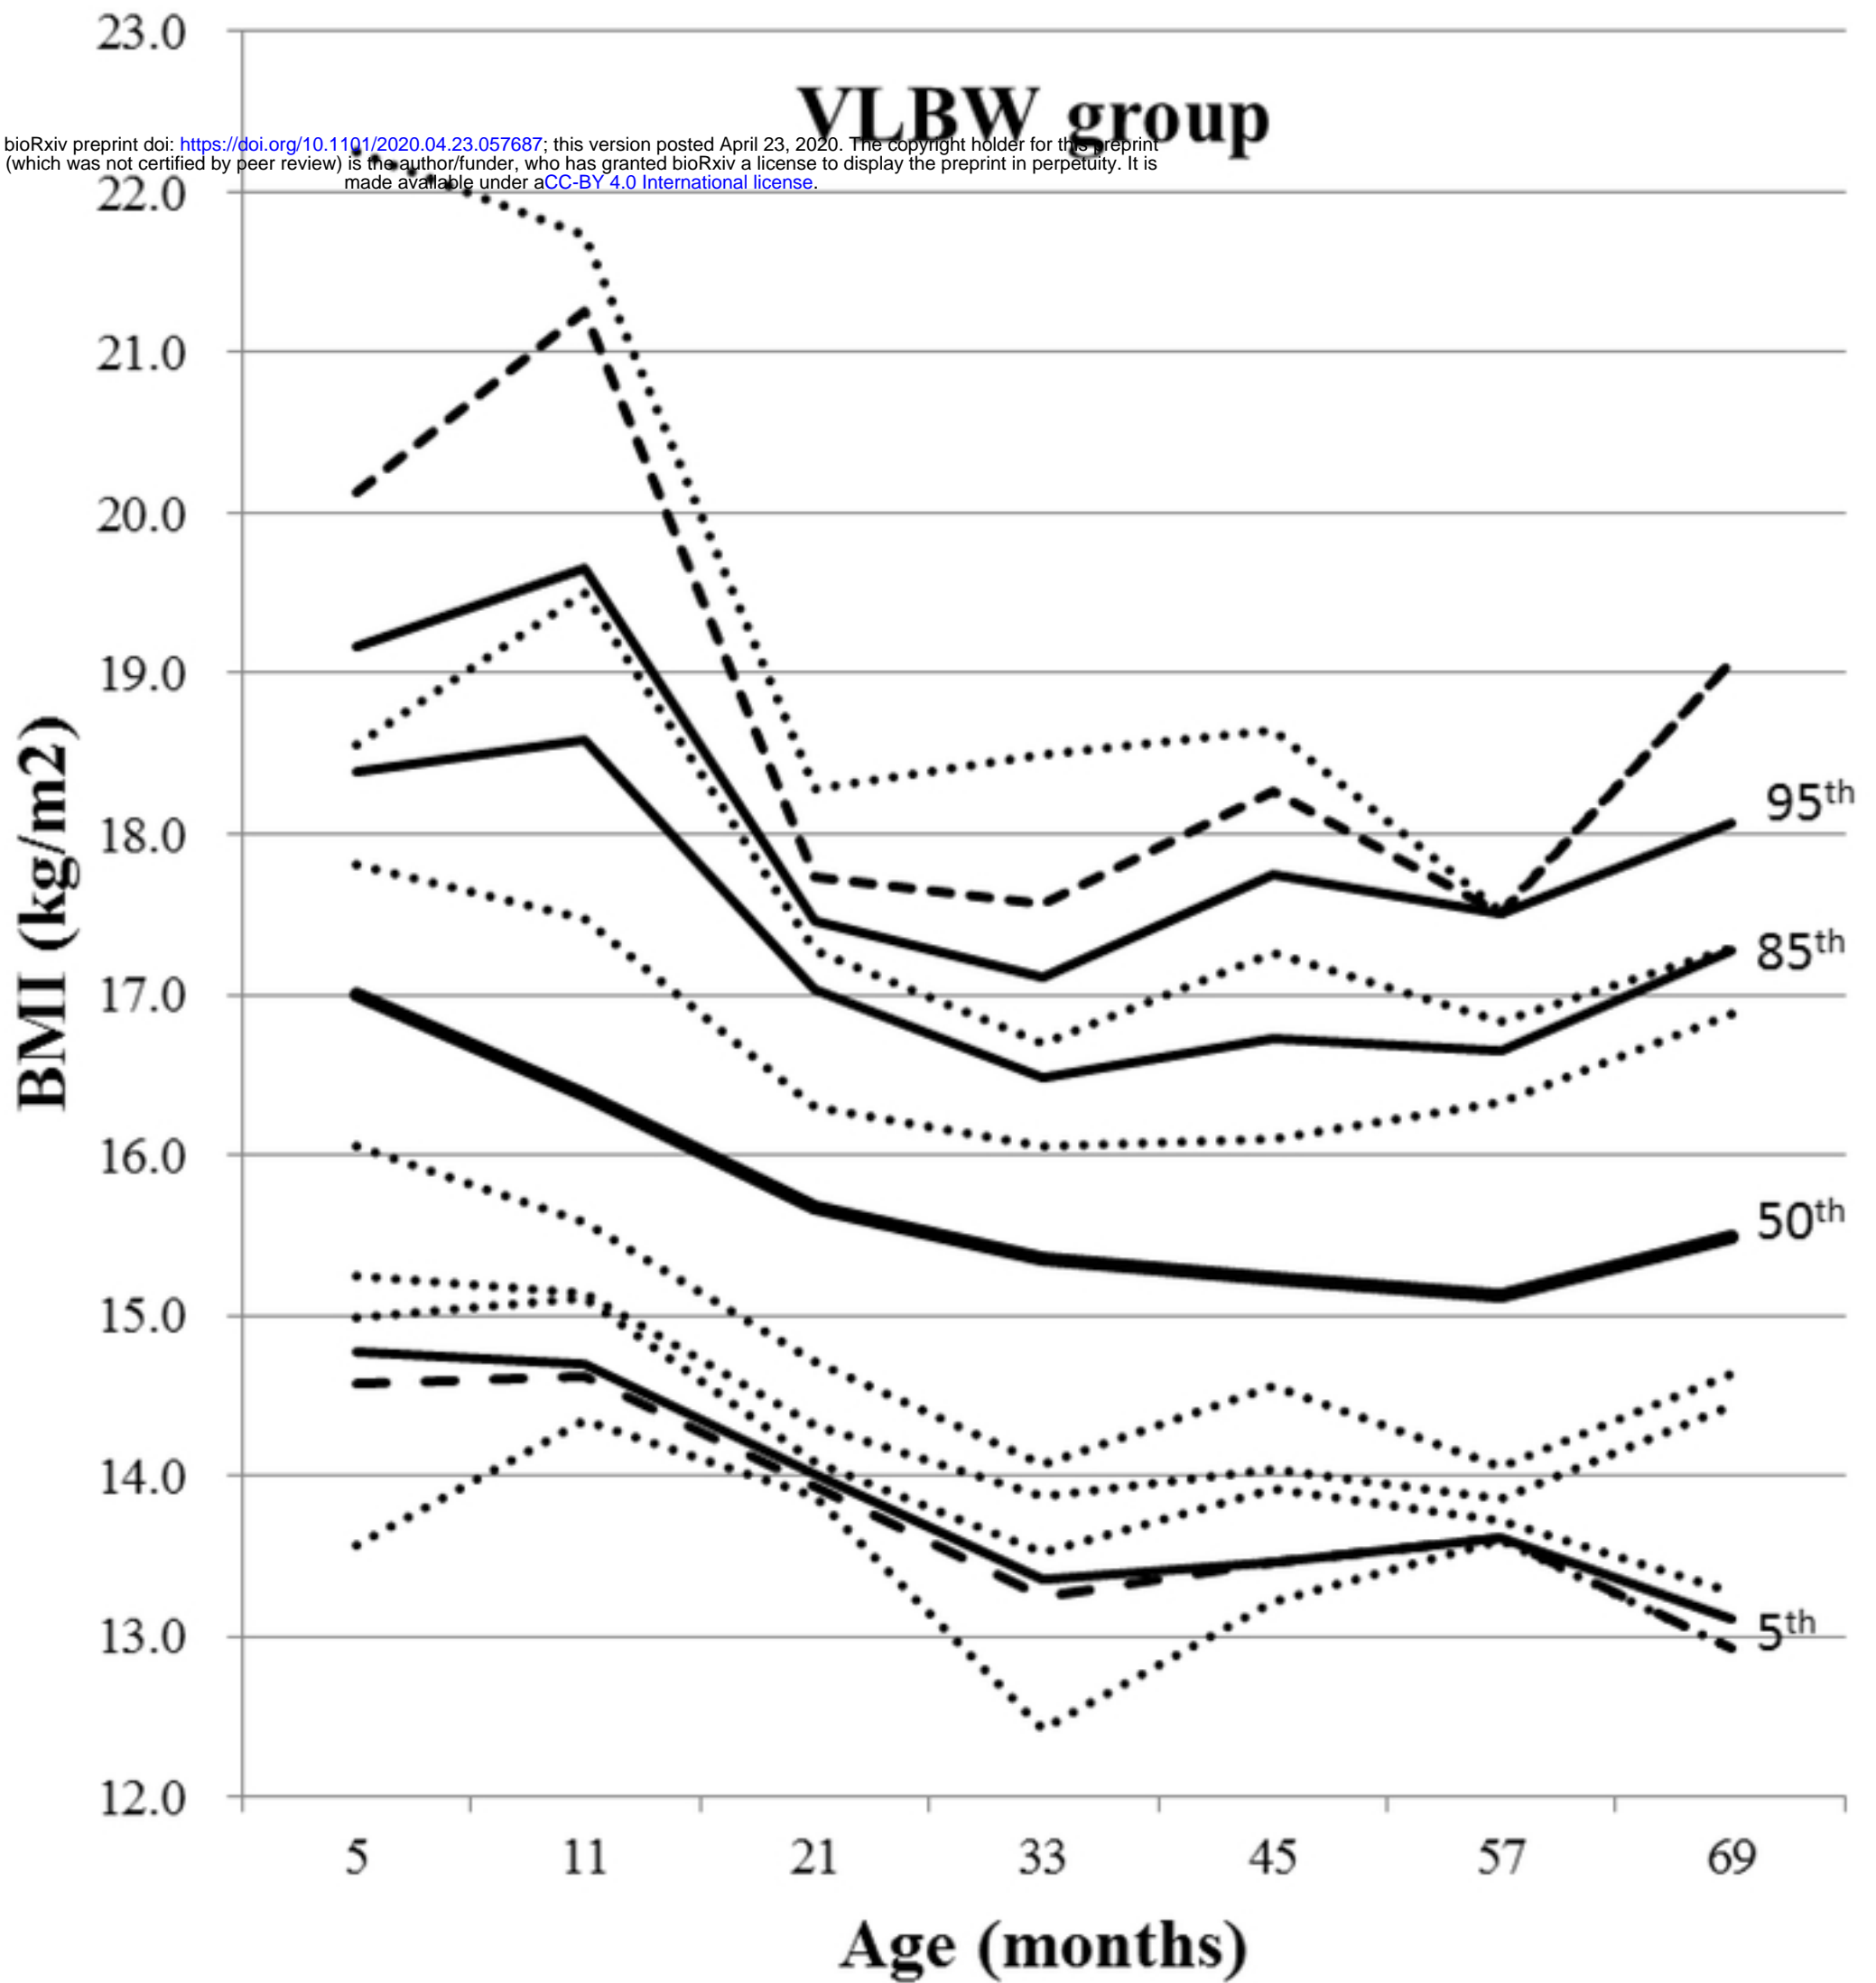

Fig 3D

# LBW group

bioRxiv preprint doi: <https://doi.org/10.1101/2020.04.23.057687>; this version posted April 23, 2020. The copyright holder for this preprint (which was not certified by peer review) is the author/funder, who has granted bioRxiv a license to display the preprint in perpetuity. It is made available under aCC-BY 4.0 International license.

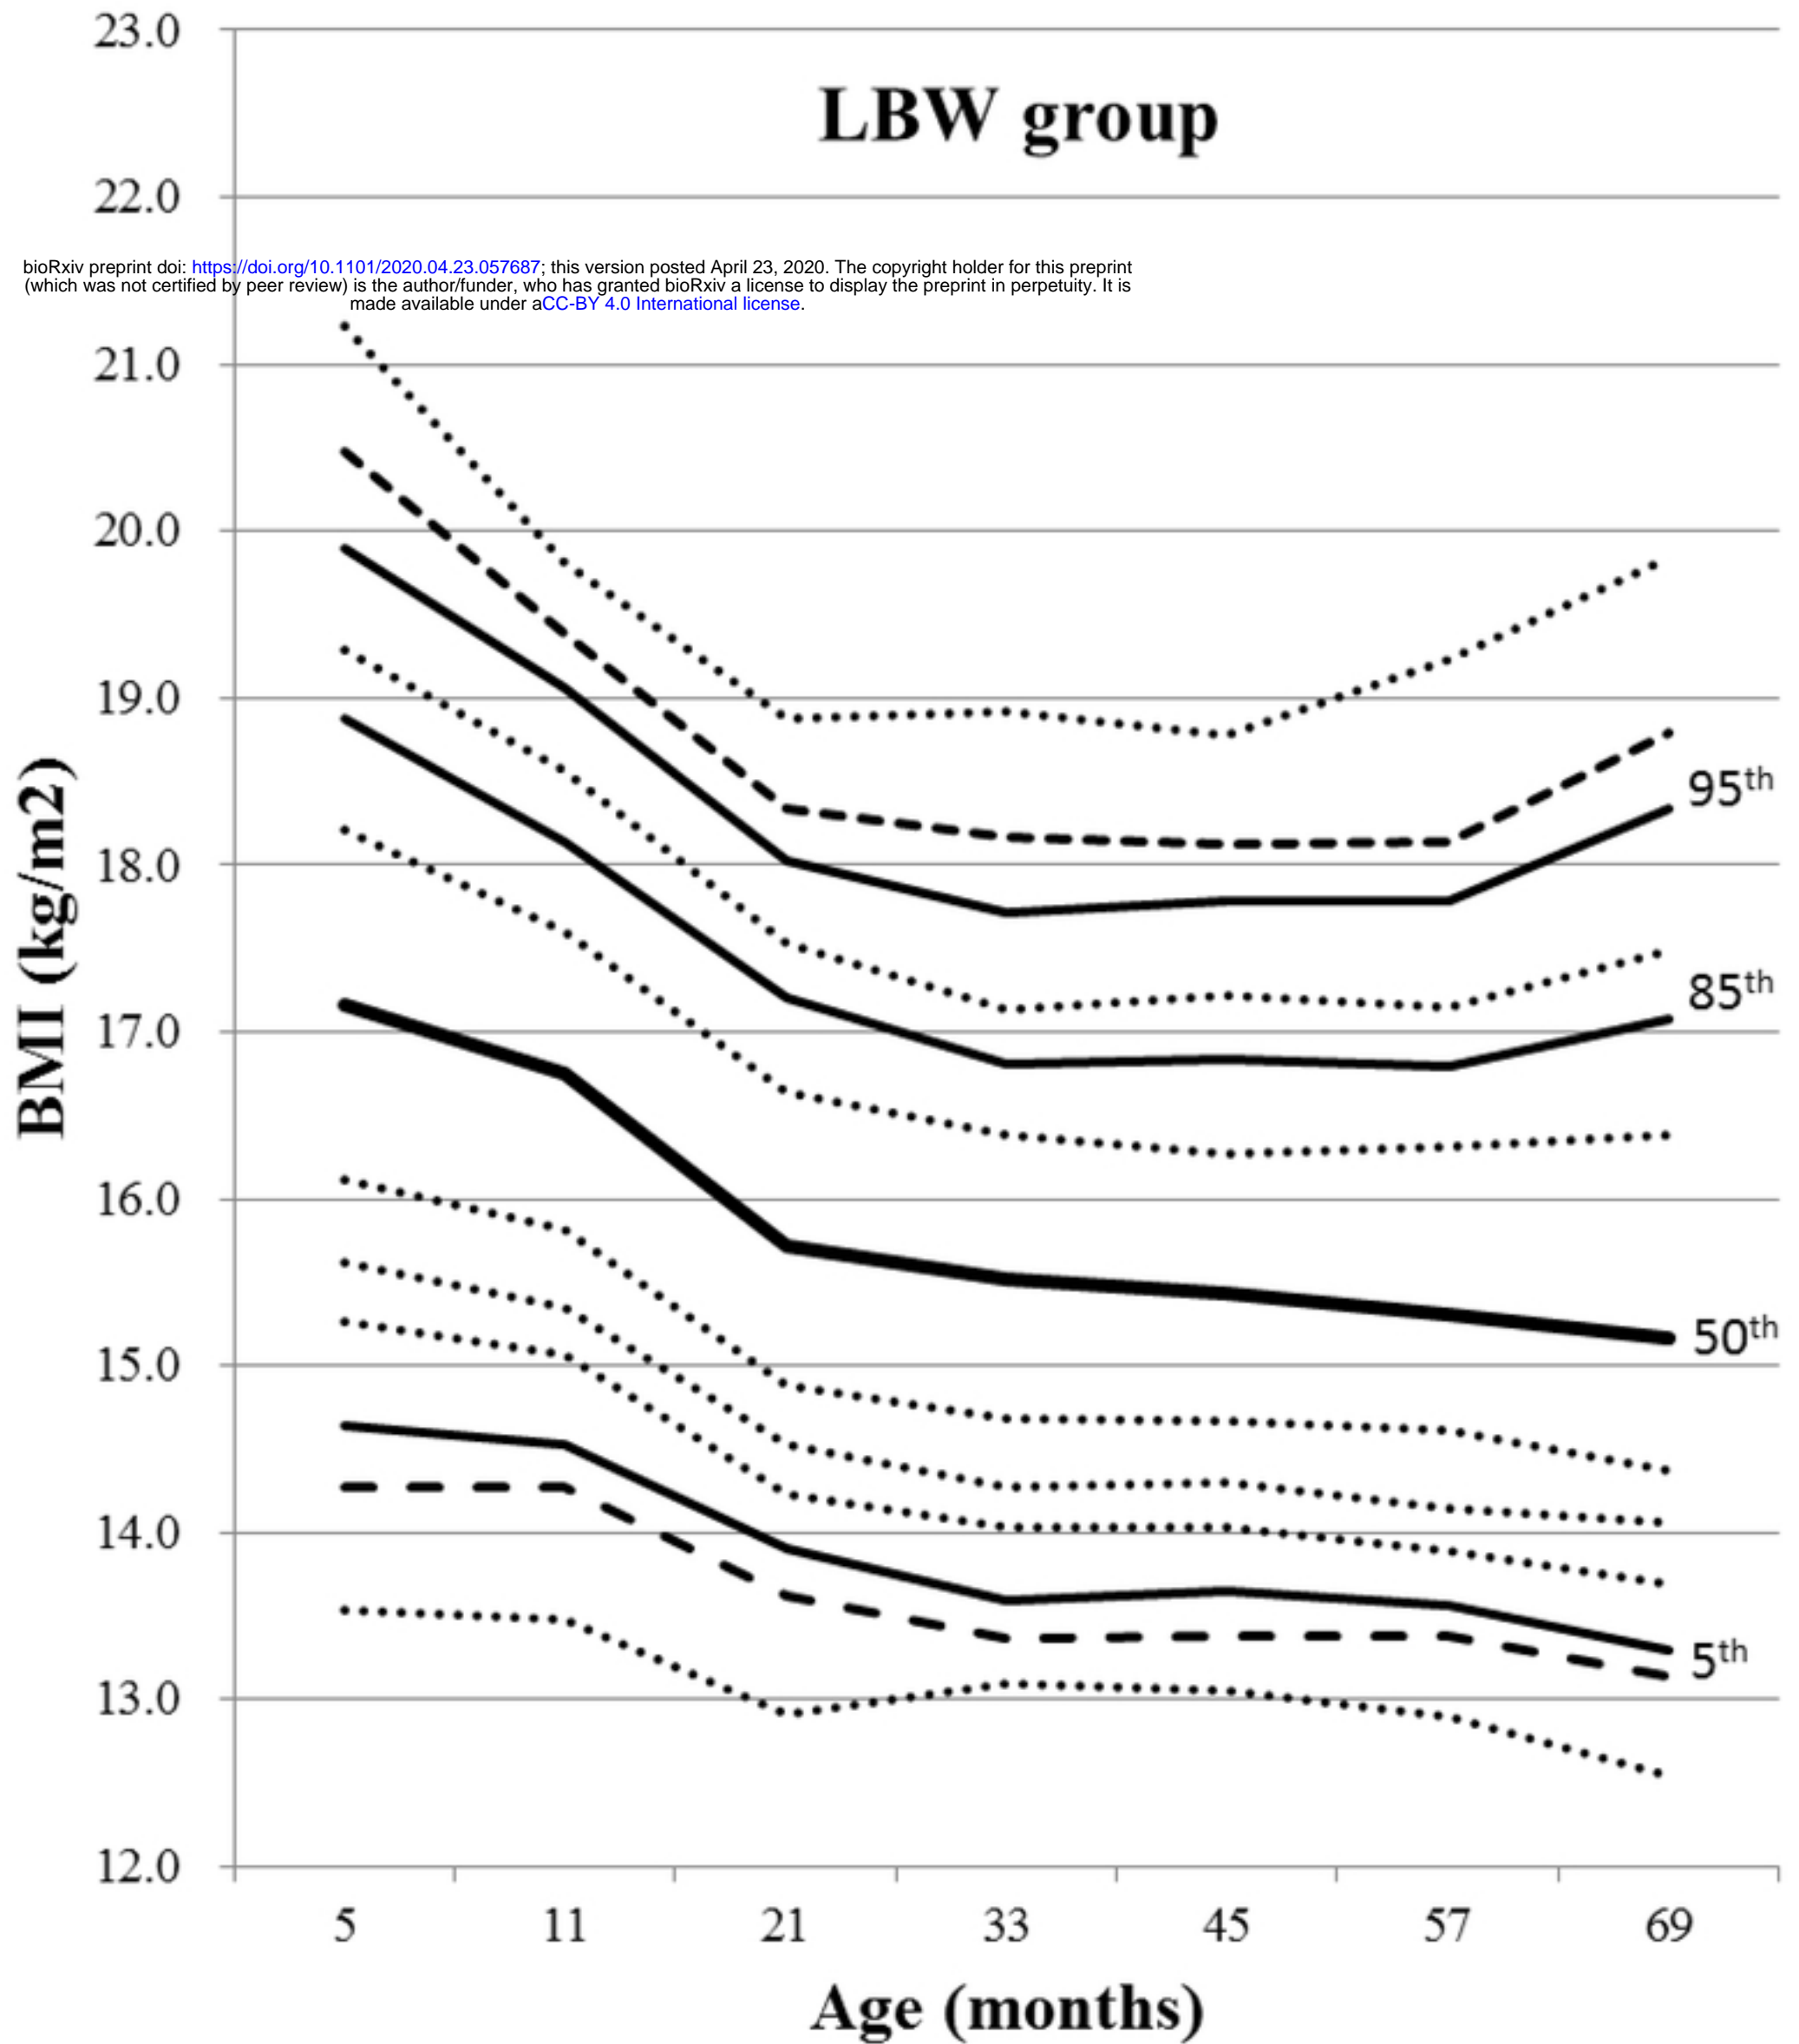

Fig 3E

# non-LBW group

bioRxiv preprint doi: <https://doi.org/10.1101/2020.04.23.057687>; this version posted April 23, 2020. The copyright holder for this preprint (which was not certified by peer review) is the author/funder, who has granted bioRxiv a license to display the preprint in perpetuity. It is made available under aCC-BY 4.0 International license.

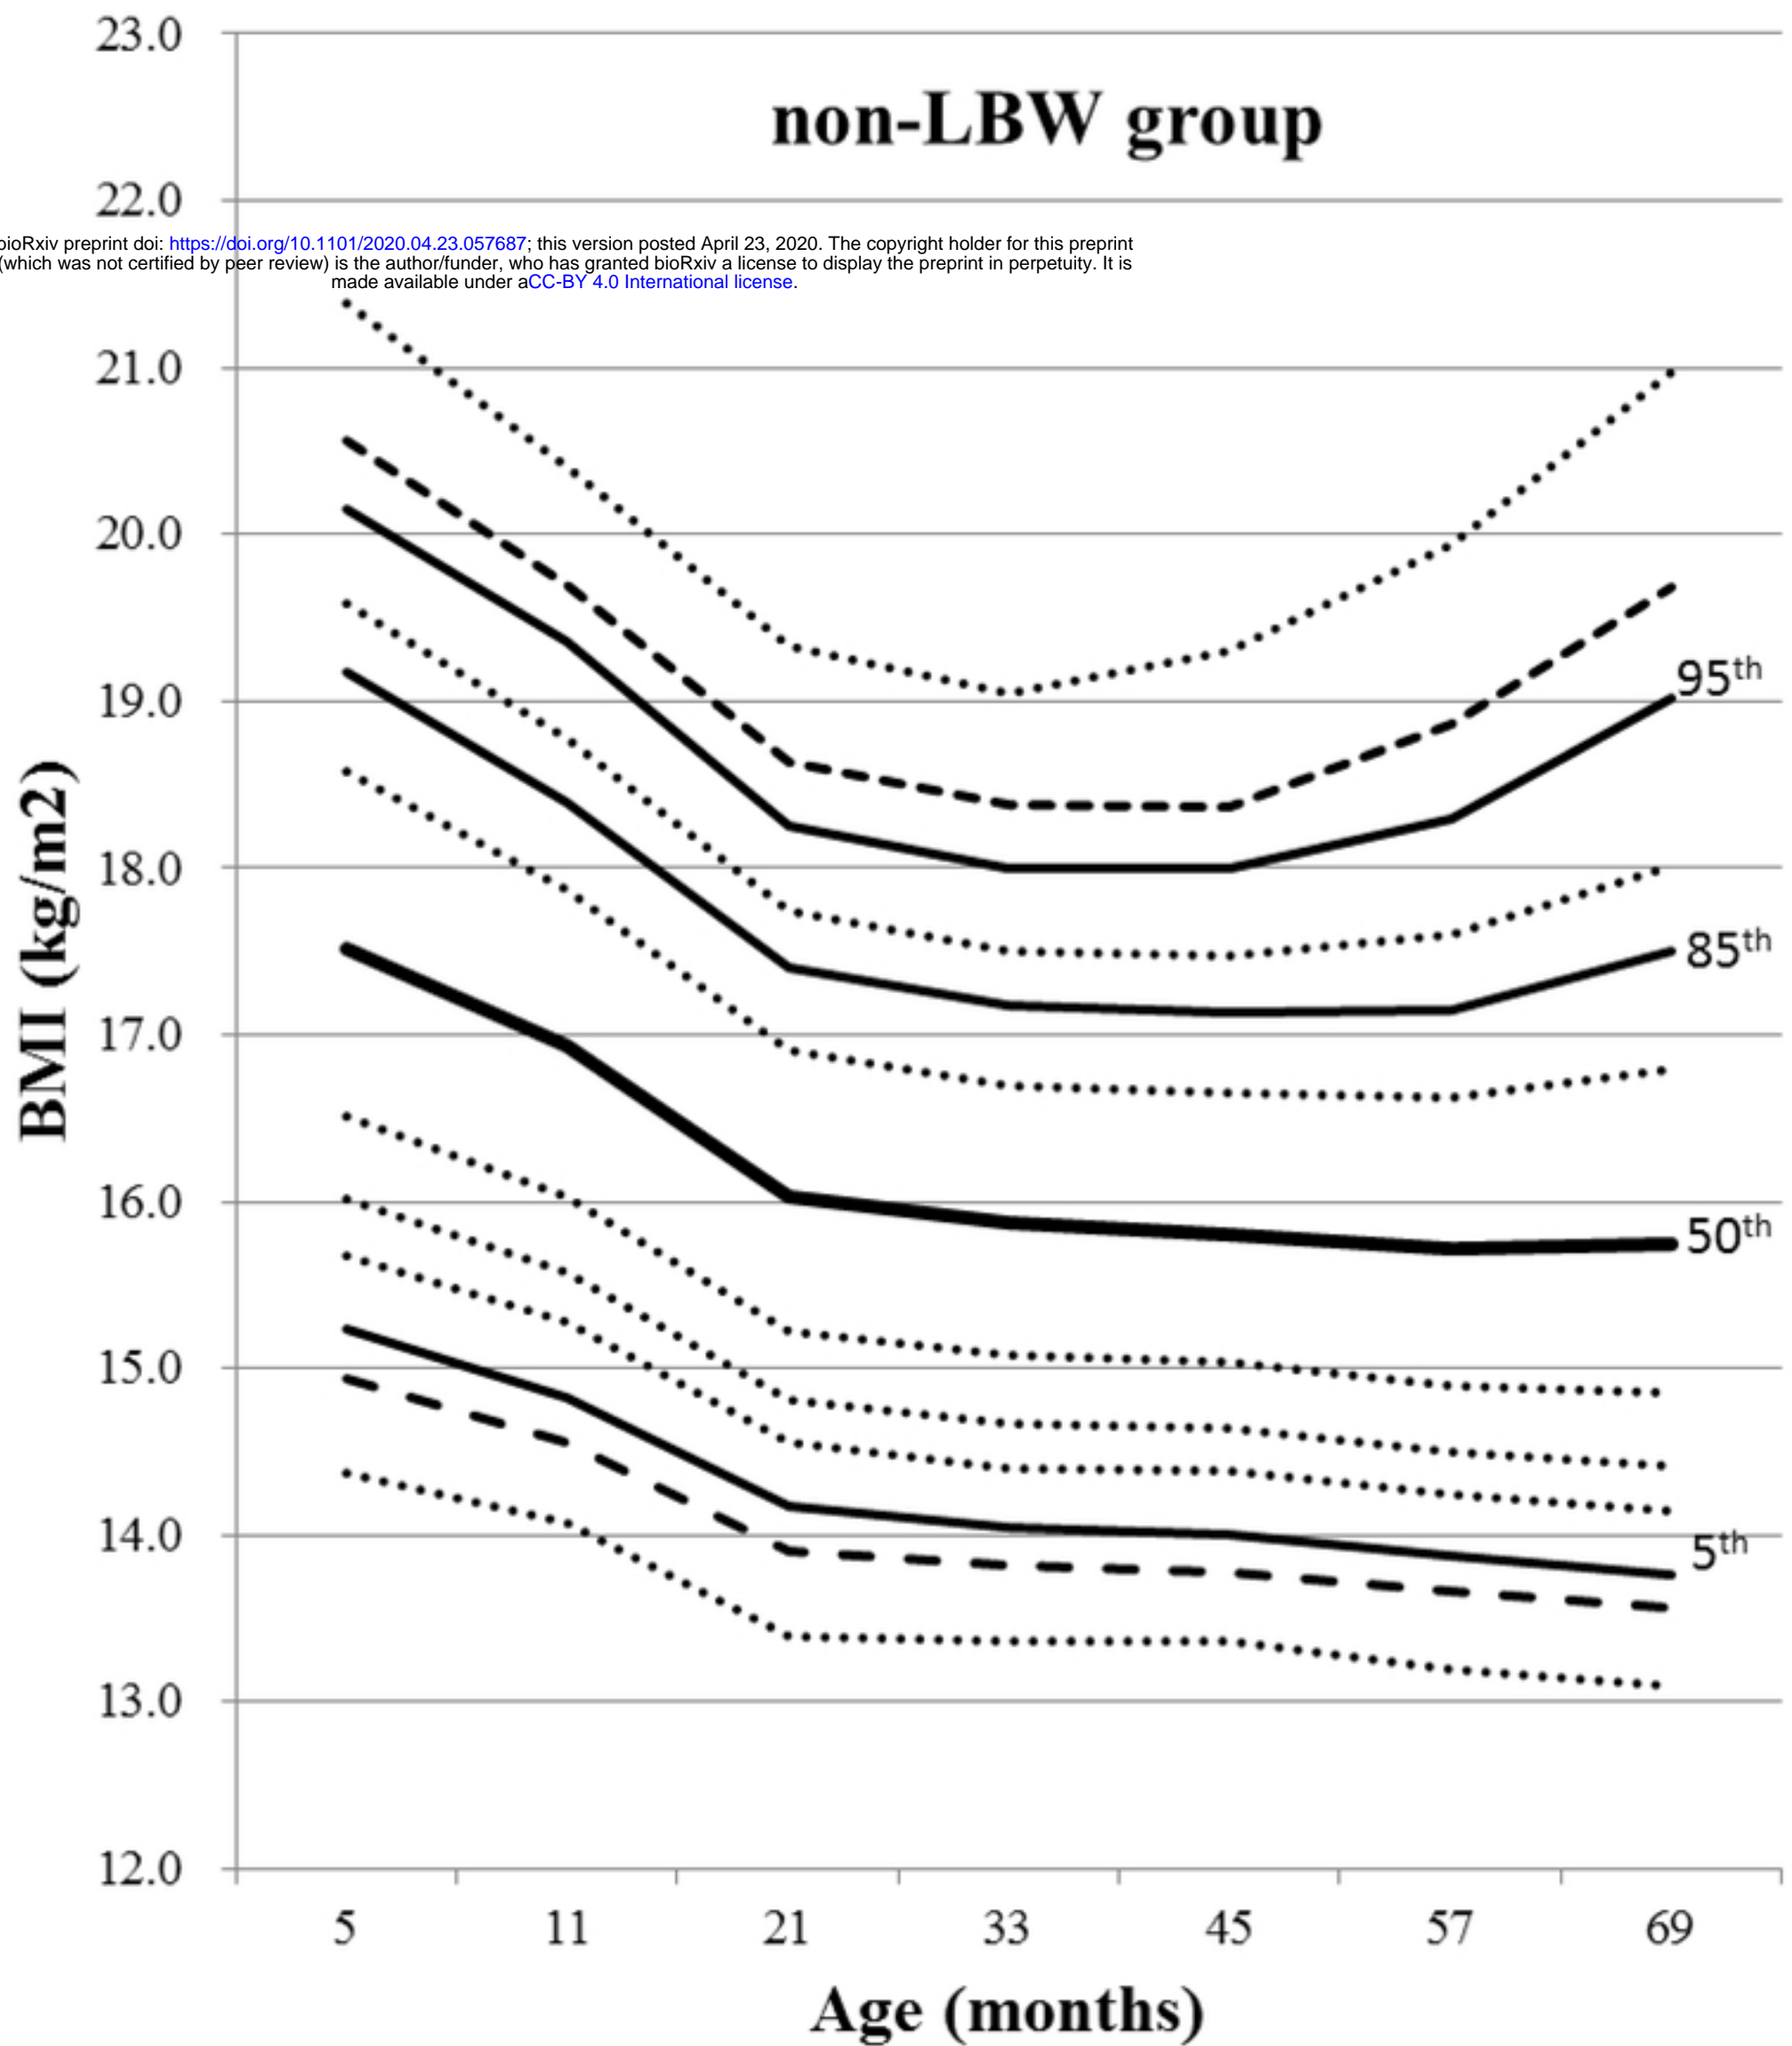

Fig 3F

# Early AR

bioRxiv preprint doi: <https://doi.org/10.1101/2020.04.23.057687>; this version posted April 23, 2020. The copyright holder for this preprint (which was not certified by peer review) is the author/funder, who has granted bioRxiv a license to display the preprint in perpetuity. It is made available under aCC-BY 4.0 International license.

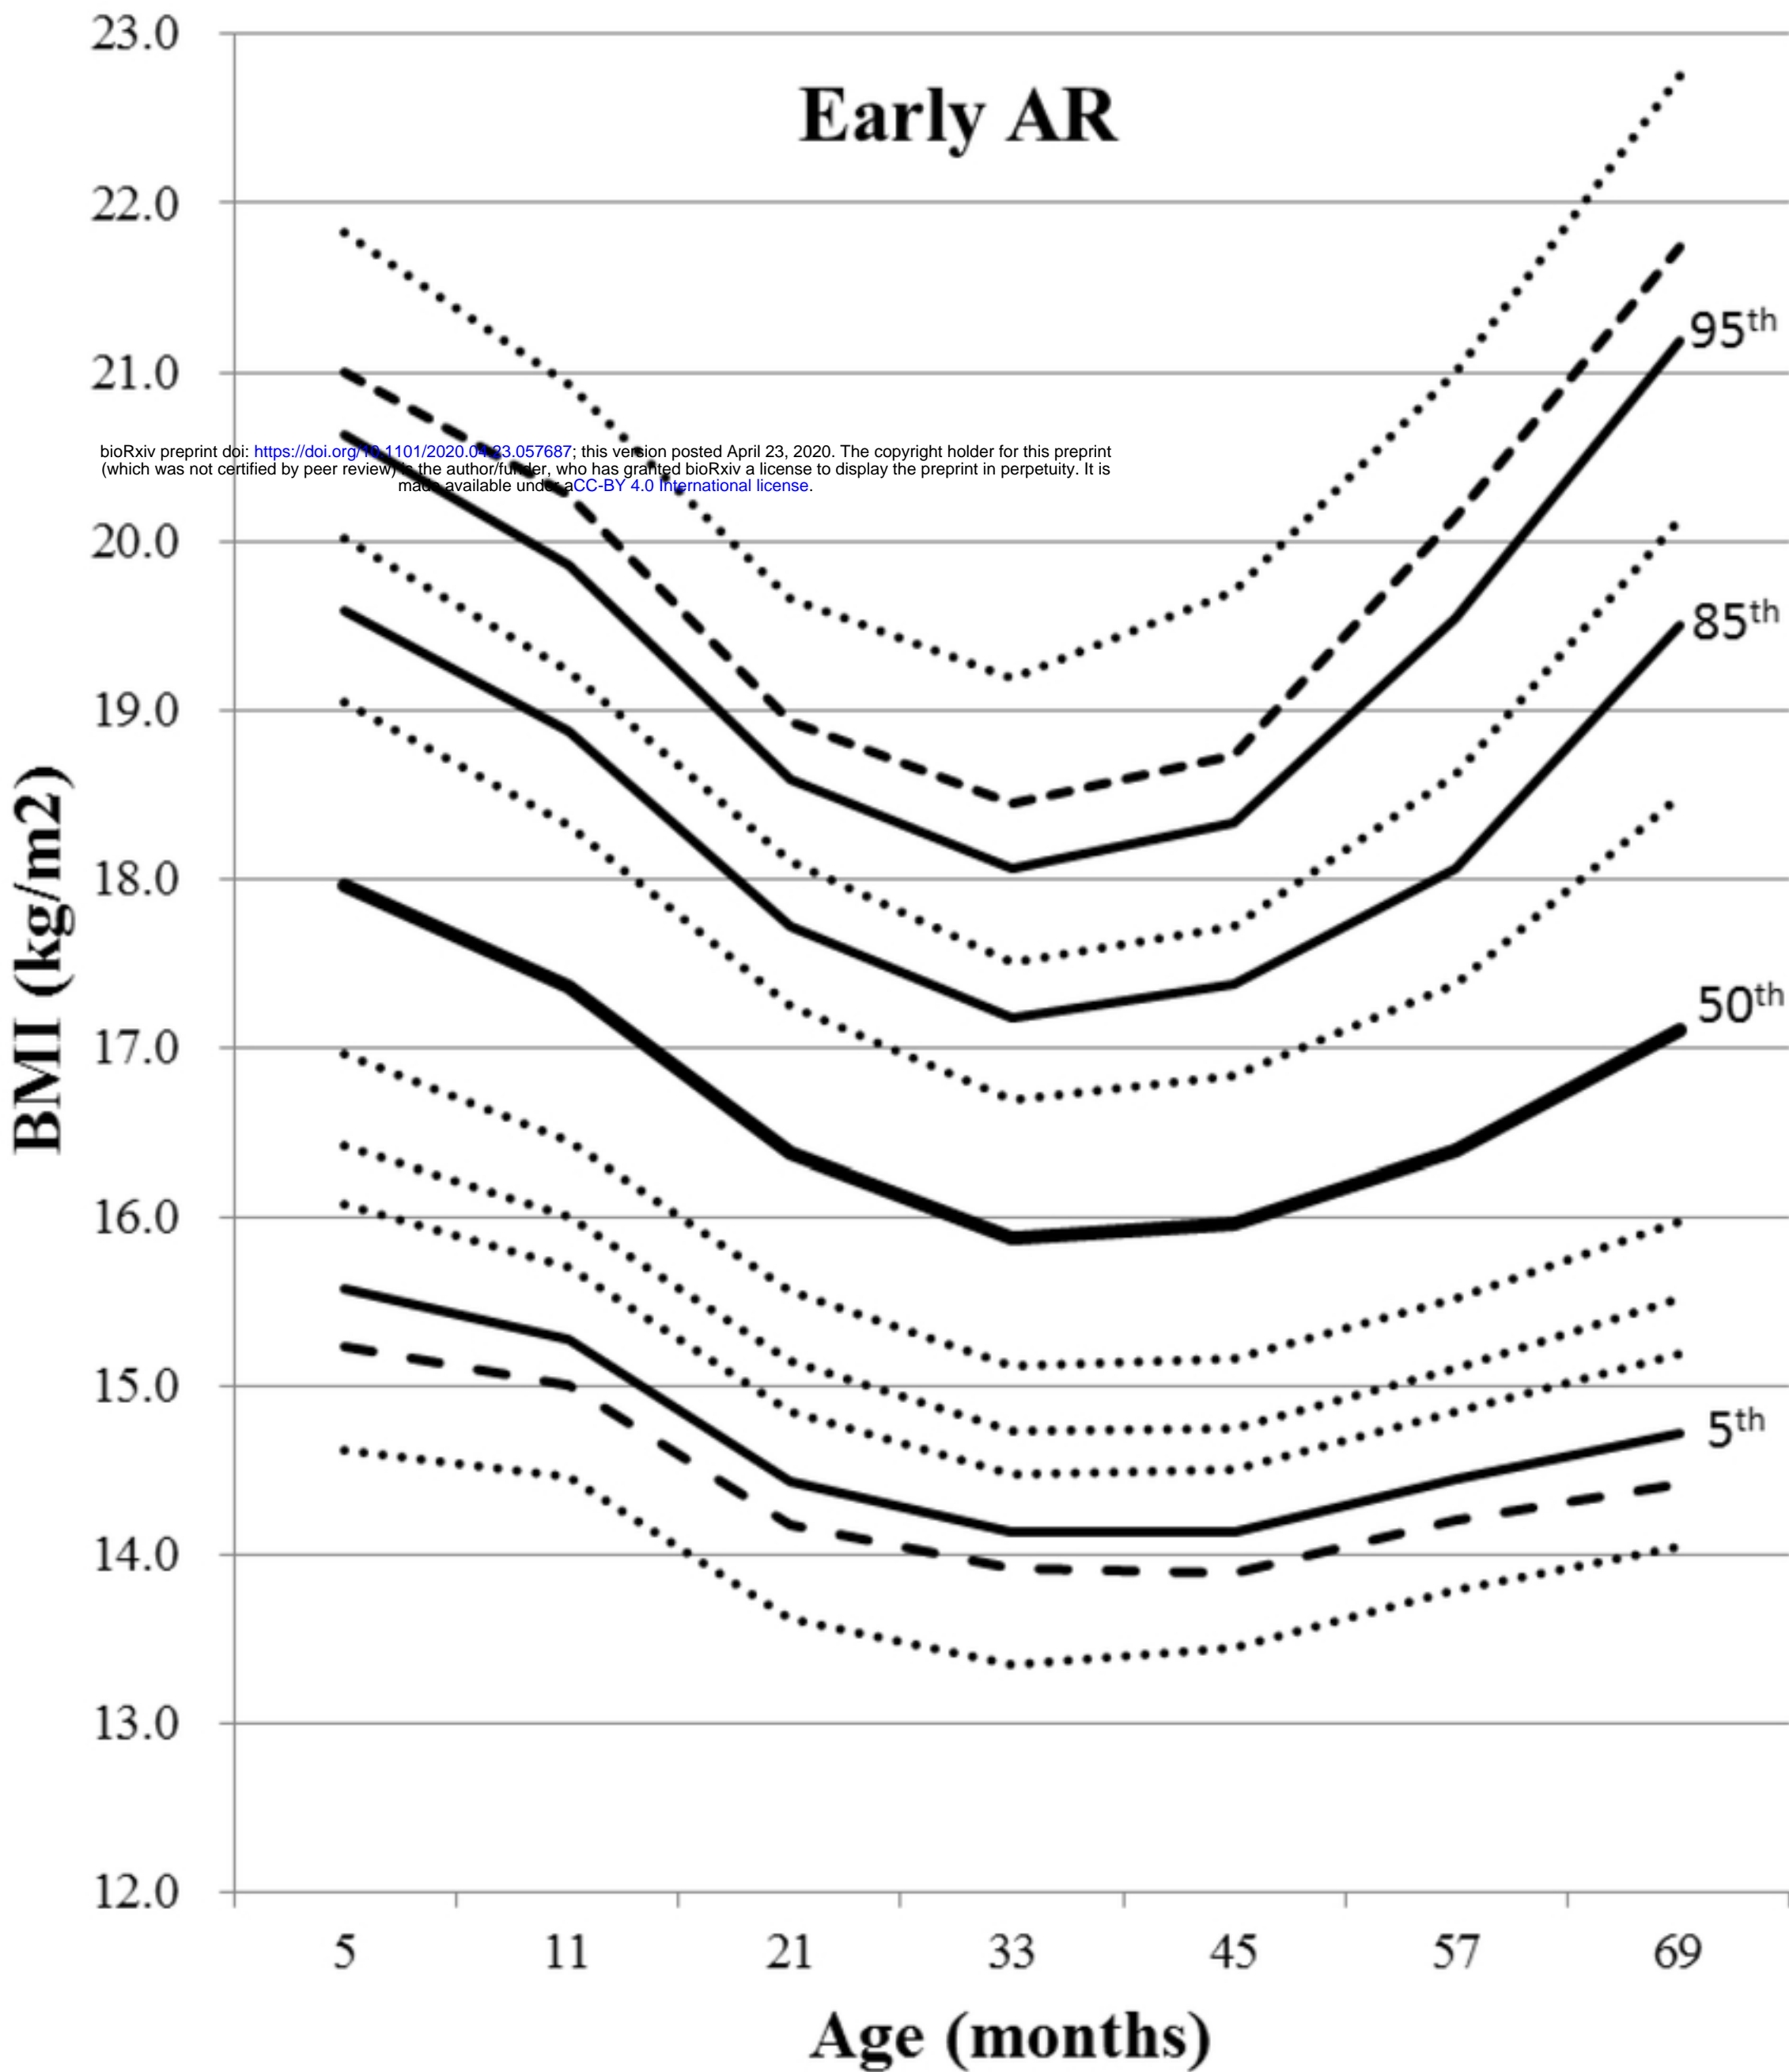

Fig 4A

# Moderate AR

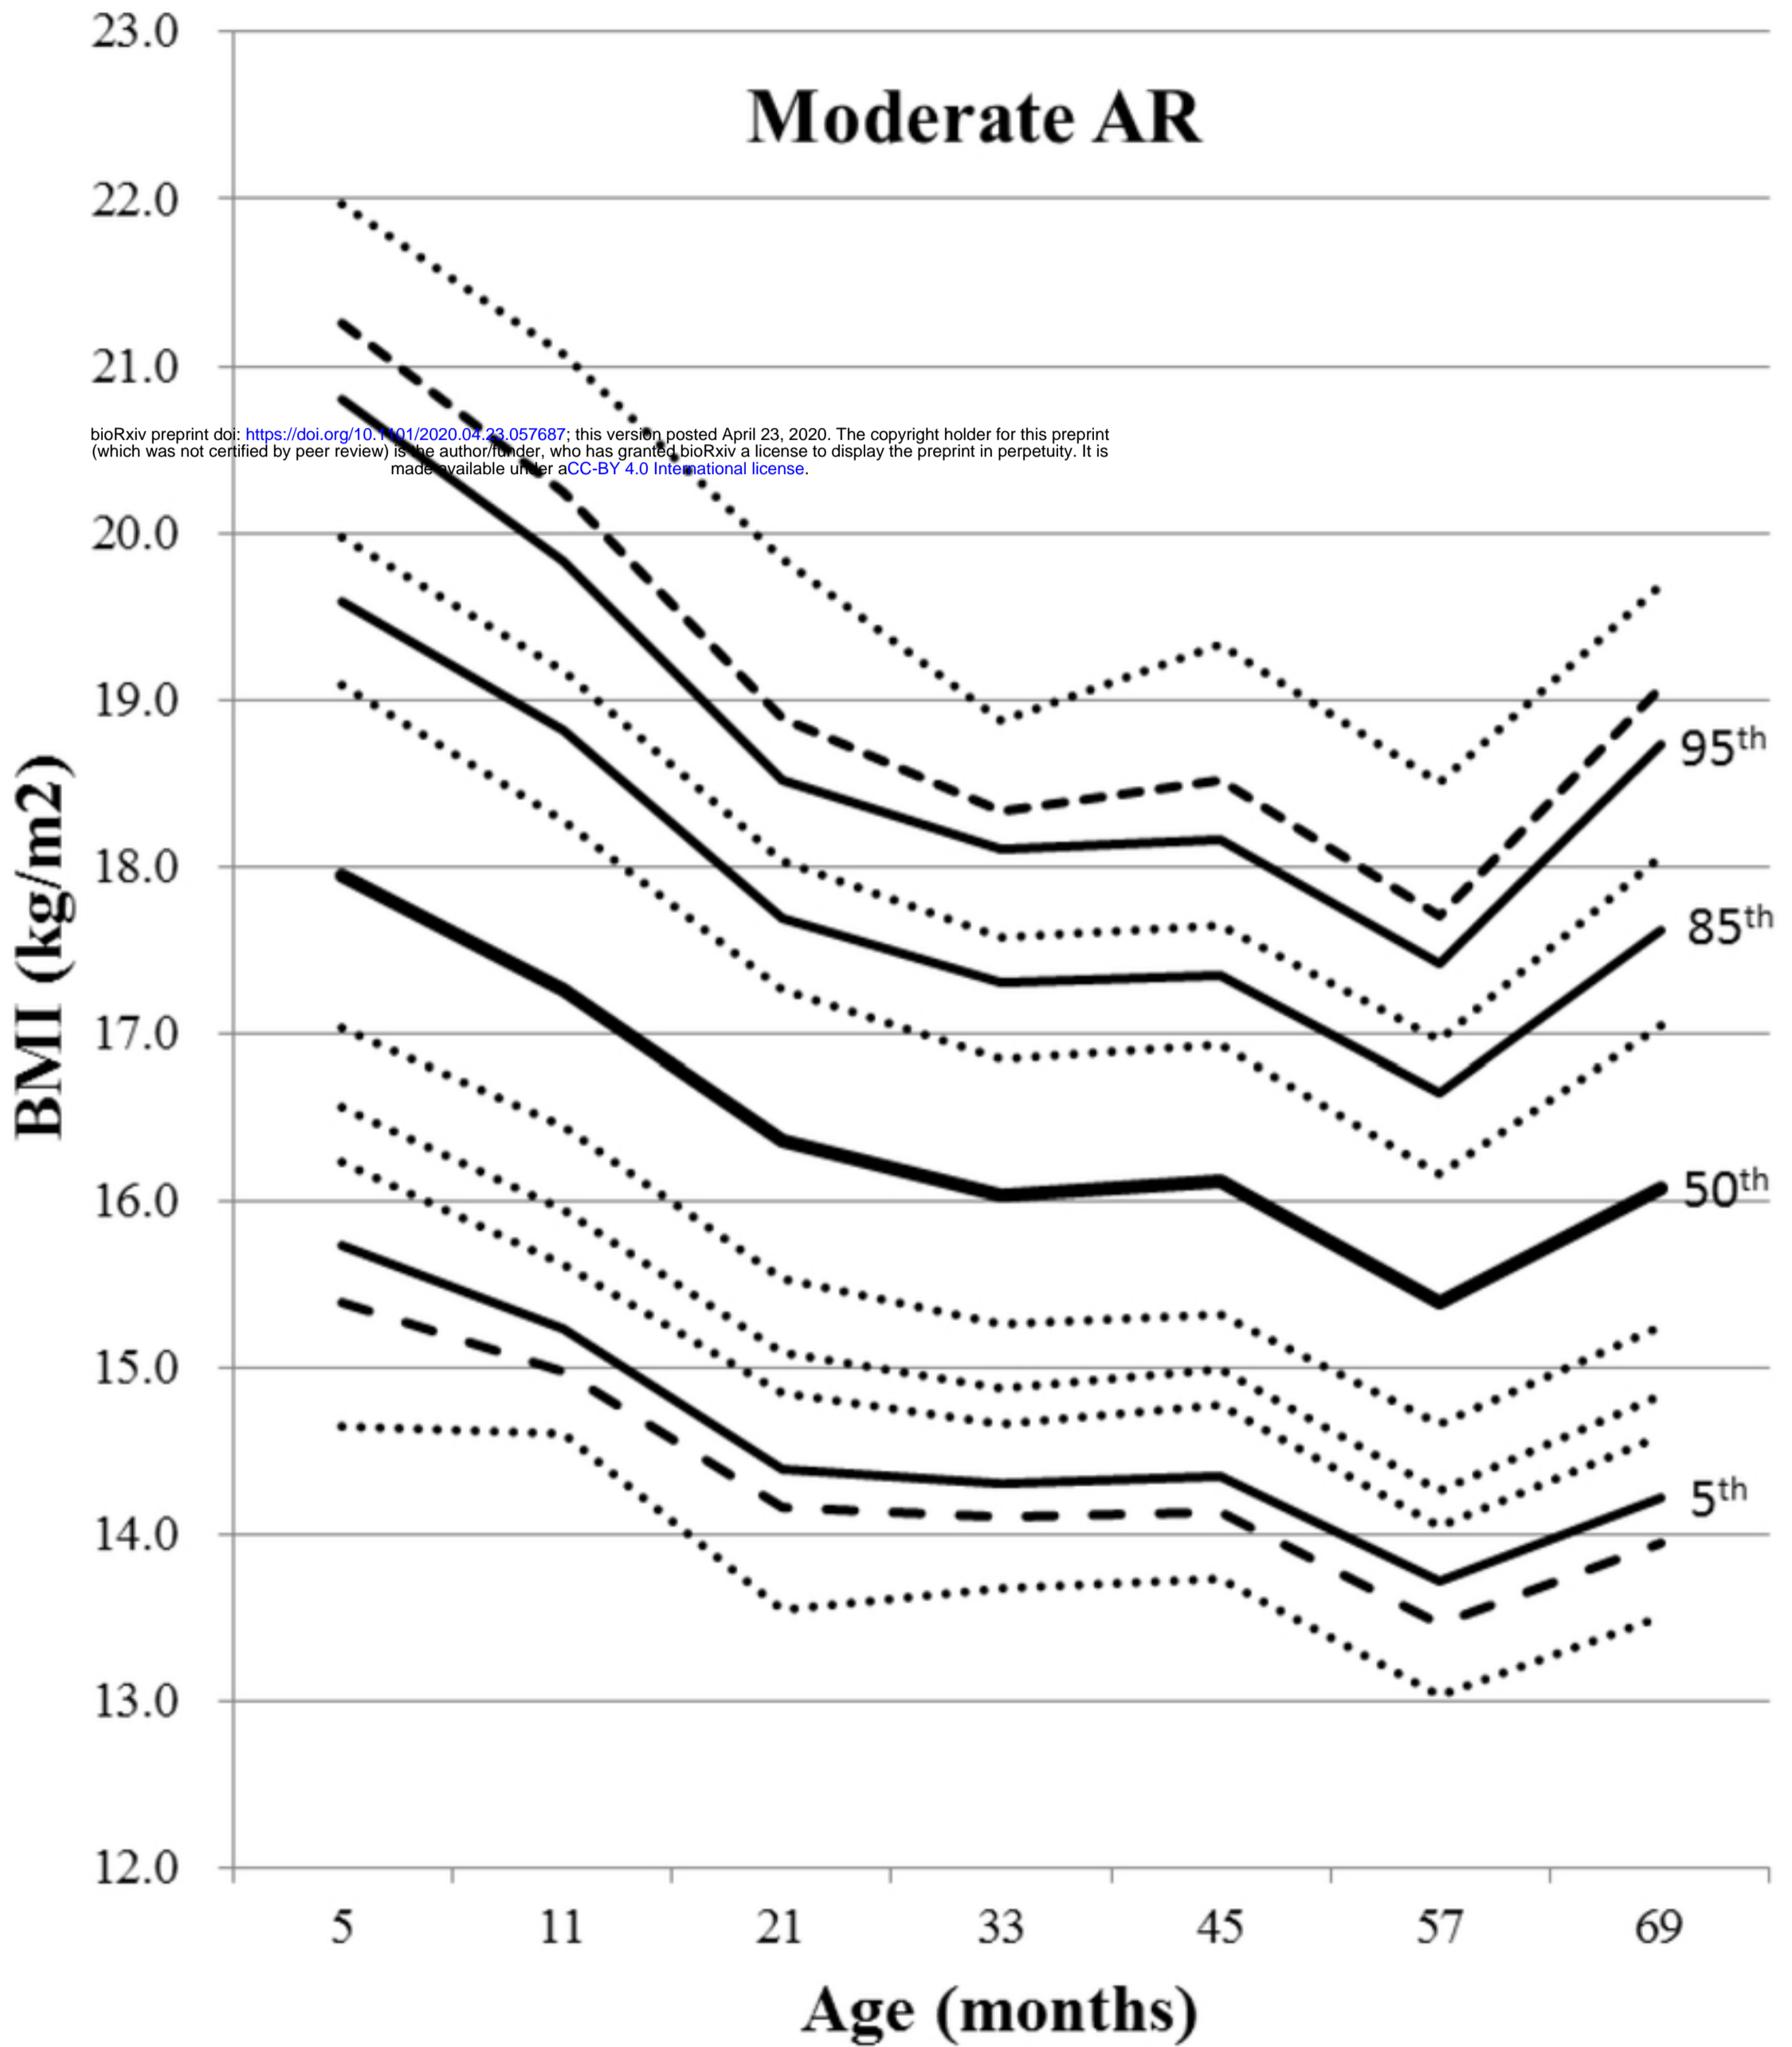

Fig 4B

# Late AR

bioRxiv preprint doi: <https://doi.org/10.1101/2020.04.23.057687>; this version posted April 23, 2020. The copyright holder for this preprint (which was not certified by peer review) is the author/funder, who has granted bioRxiv a license to display the preprint in perpetuity. It is made available under aCC-BY 4.0 International license.

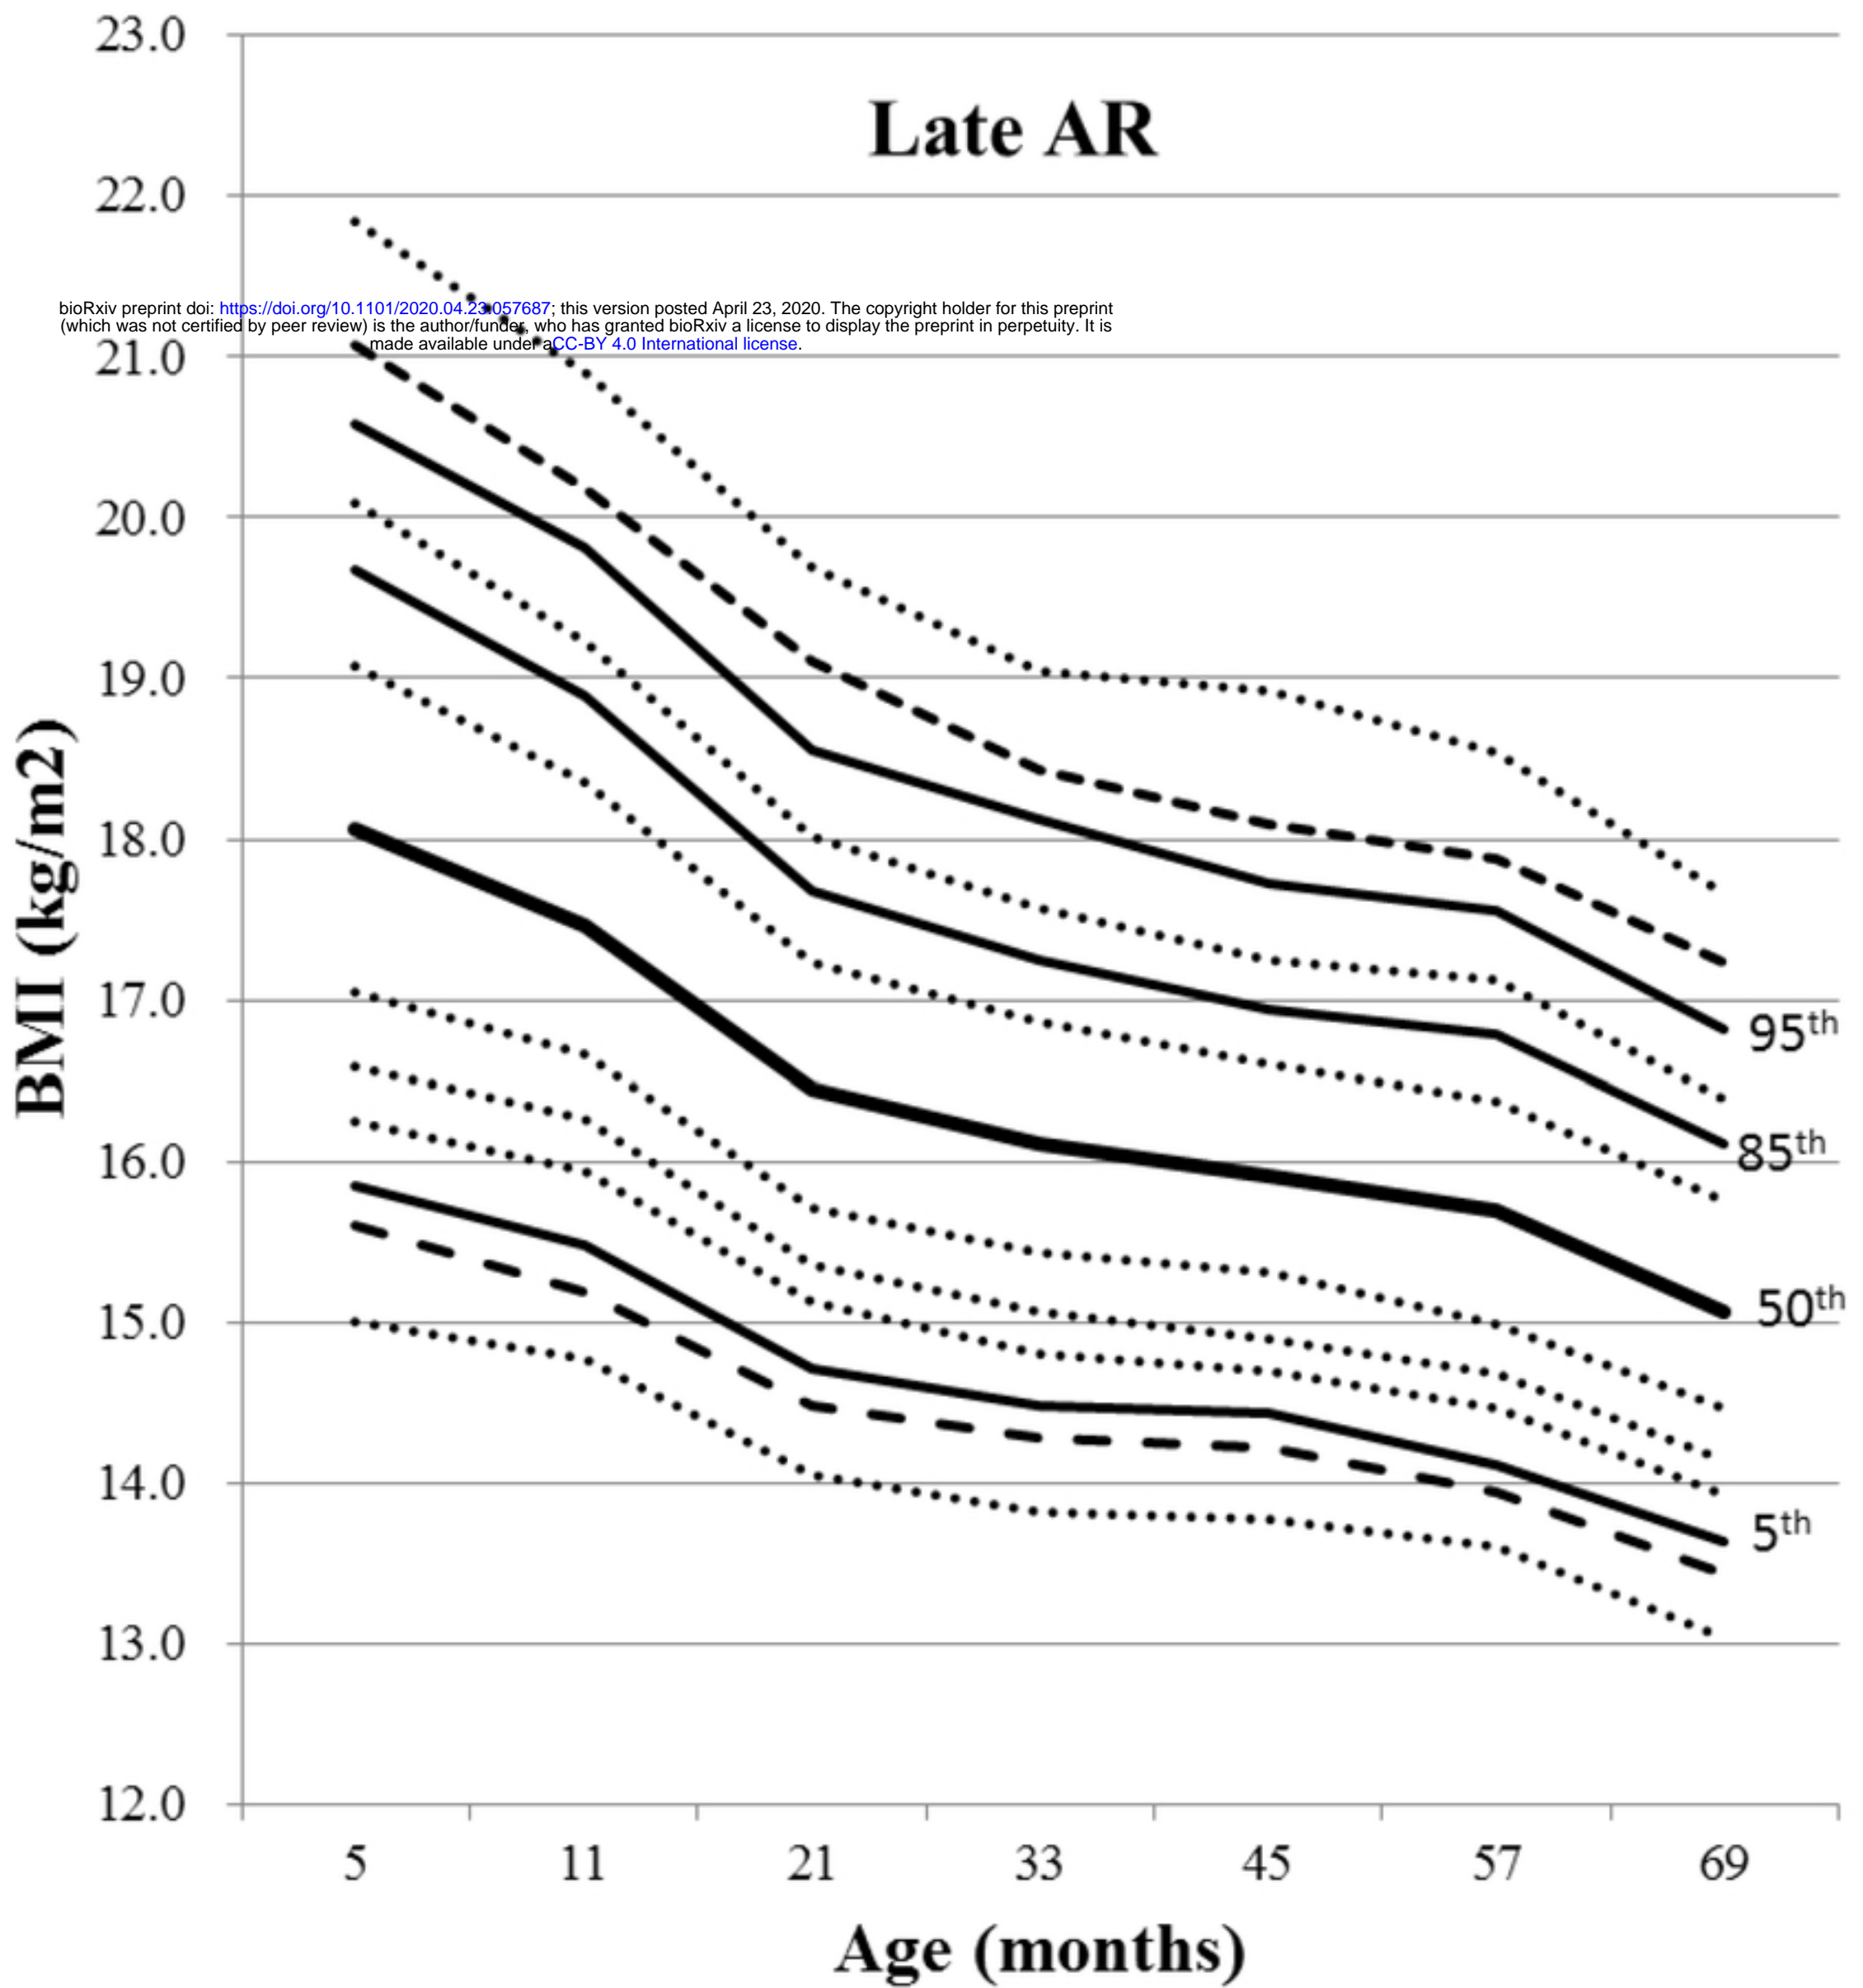

Fig 4C

# Early AR

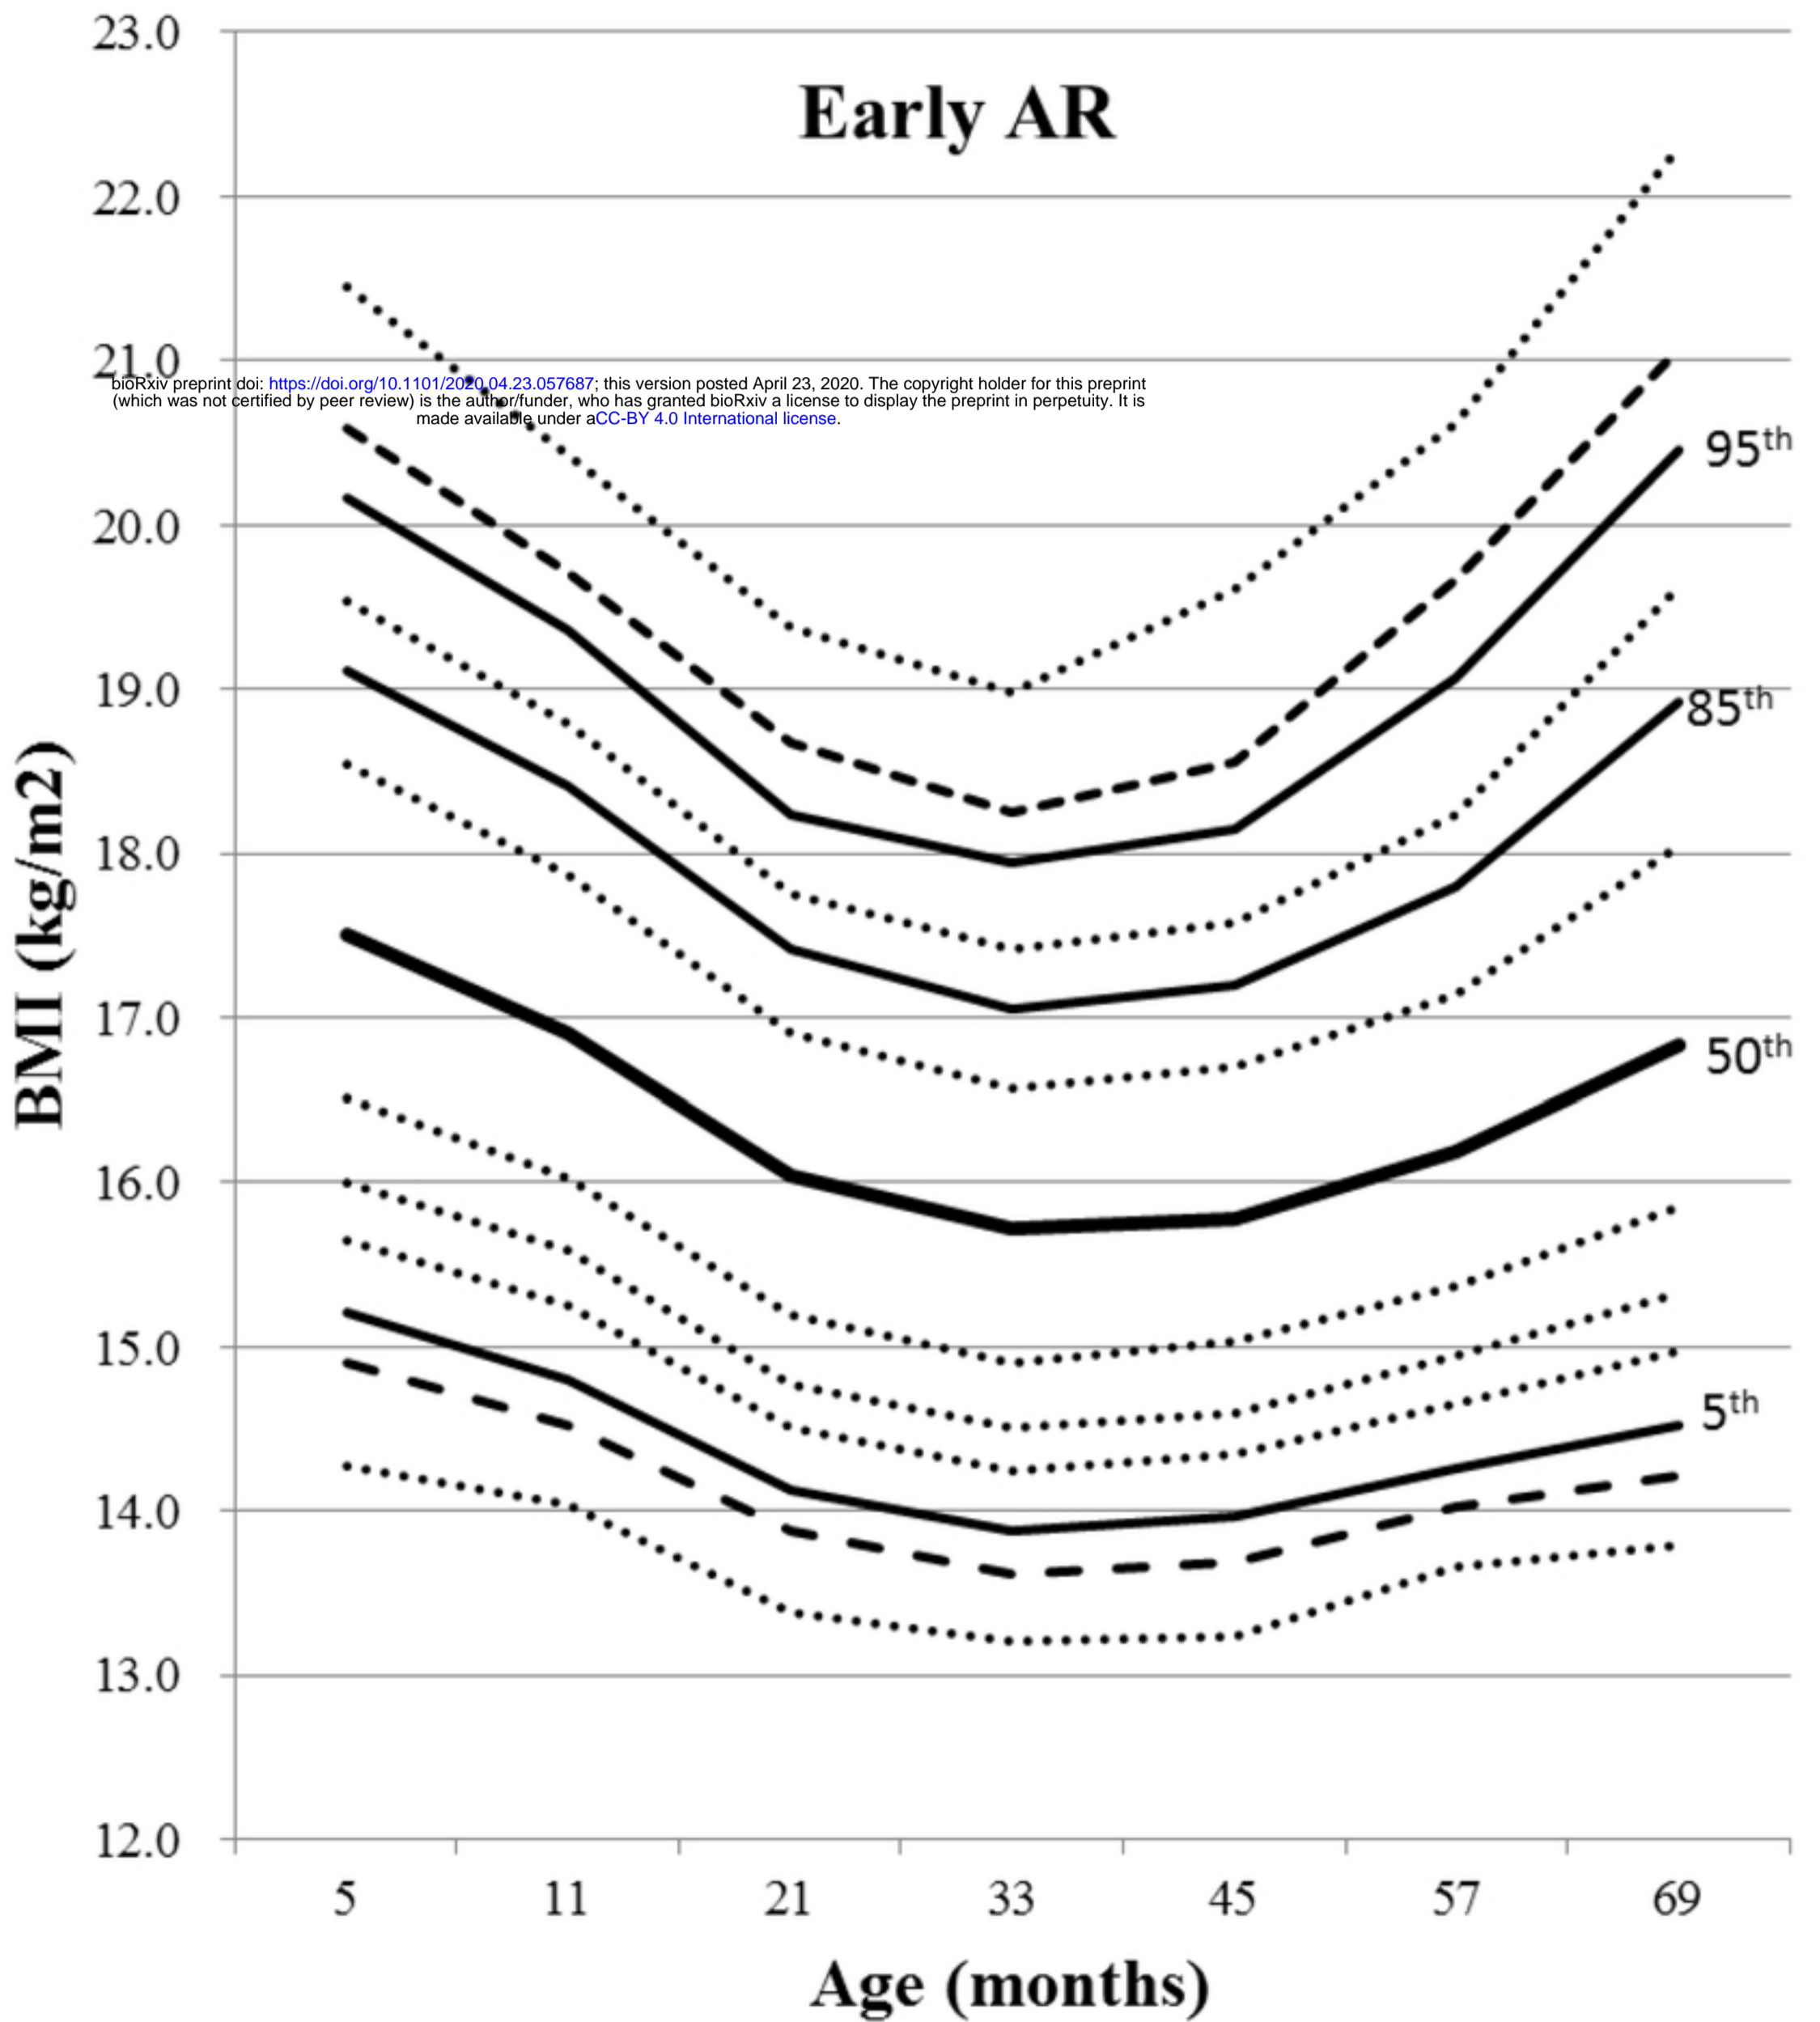

Fig 4D



# Moderate AR

bioRxiv preprint doi: <https://doi.org/10.1101/2020.04.23.057687>; this version posted April 23, 2020. The copyright holder for this preprint (which was not certified by peer review) is the author/funder, who has granted bioRxiv a license to display the preprint in perpetuity. It is made available under aCC-BY 4.0 International license.

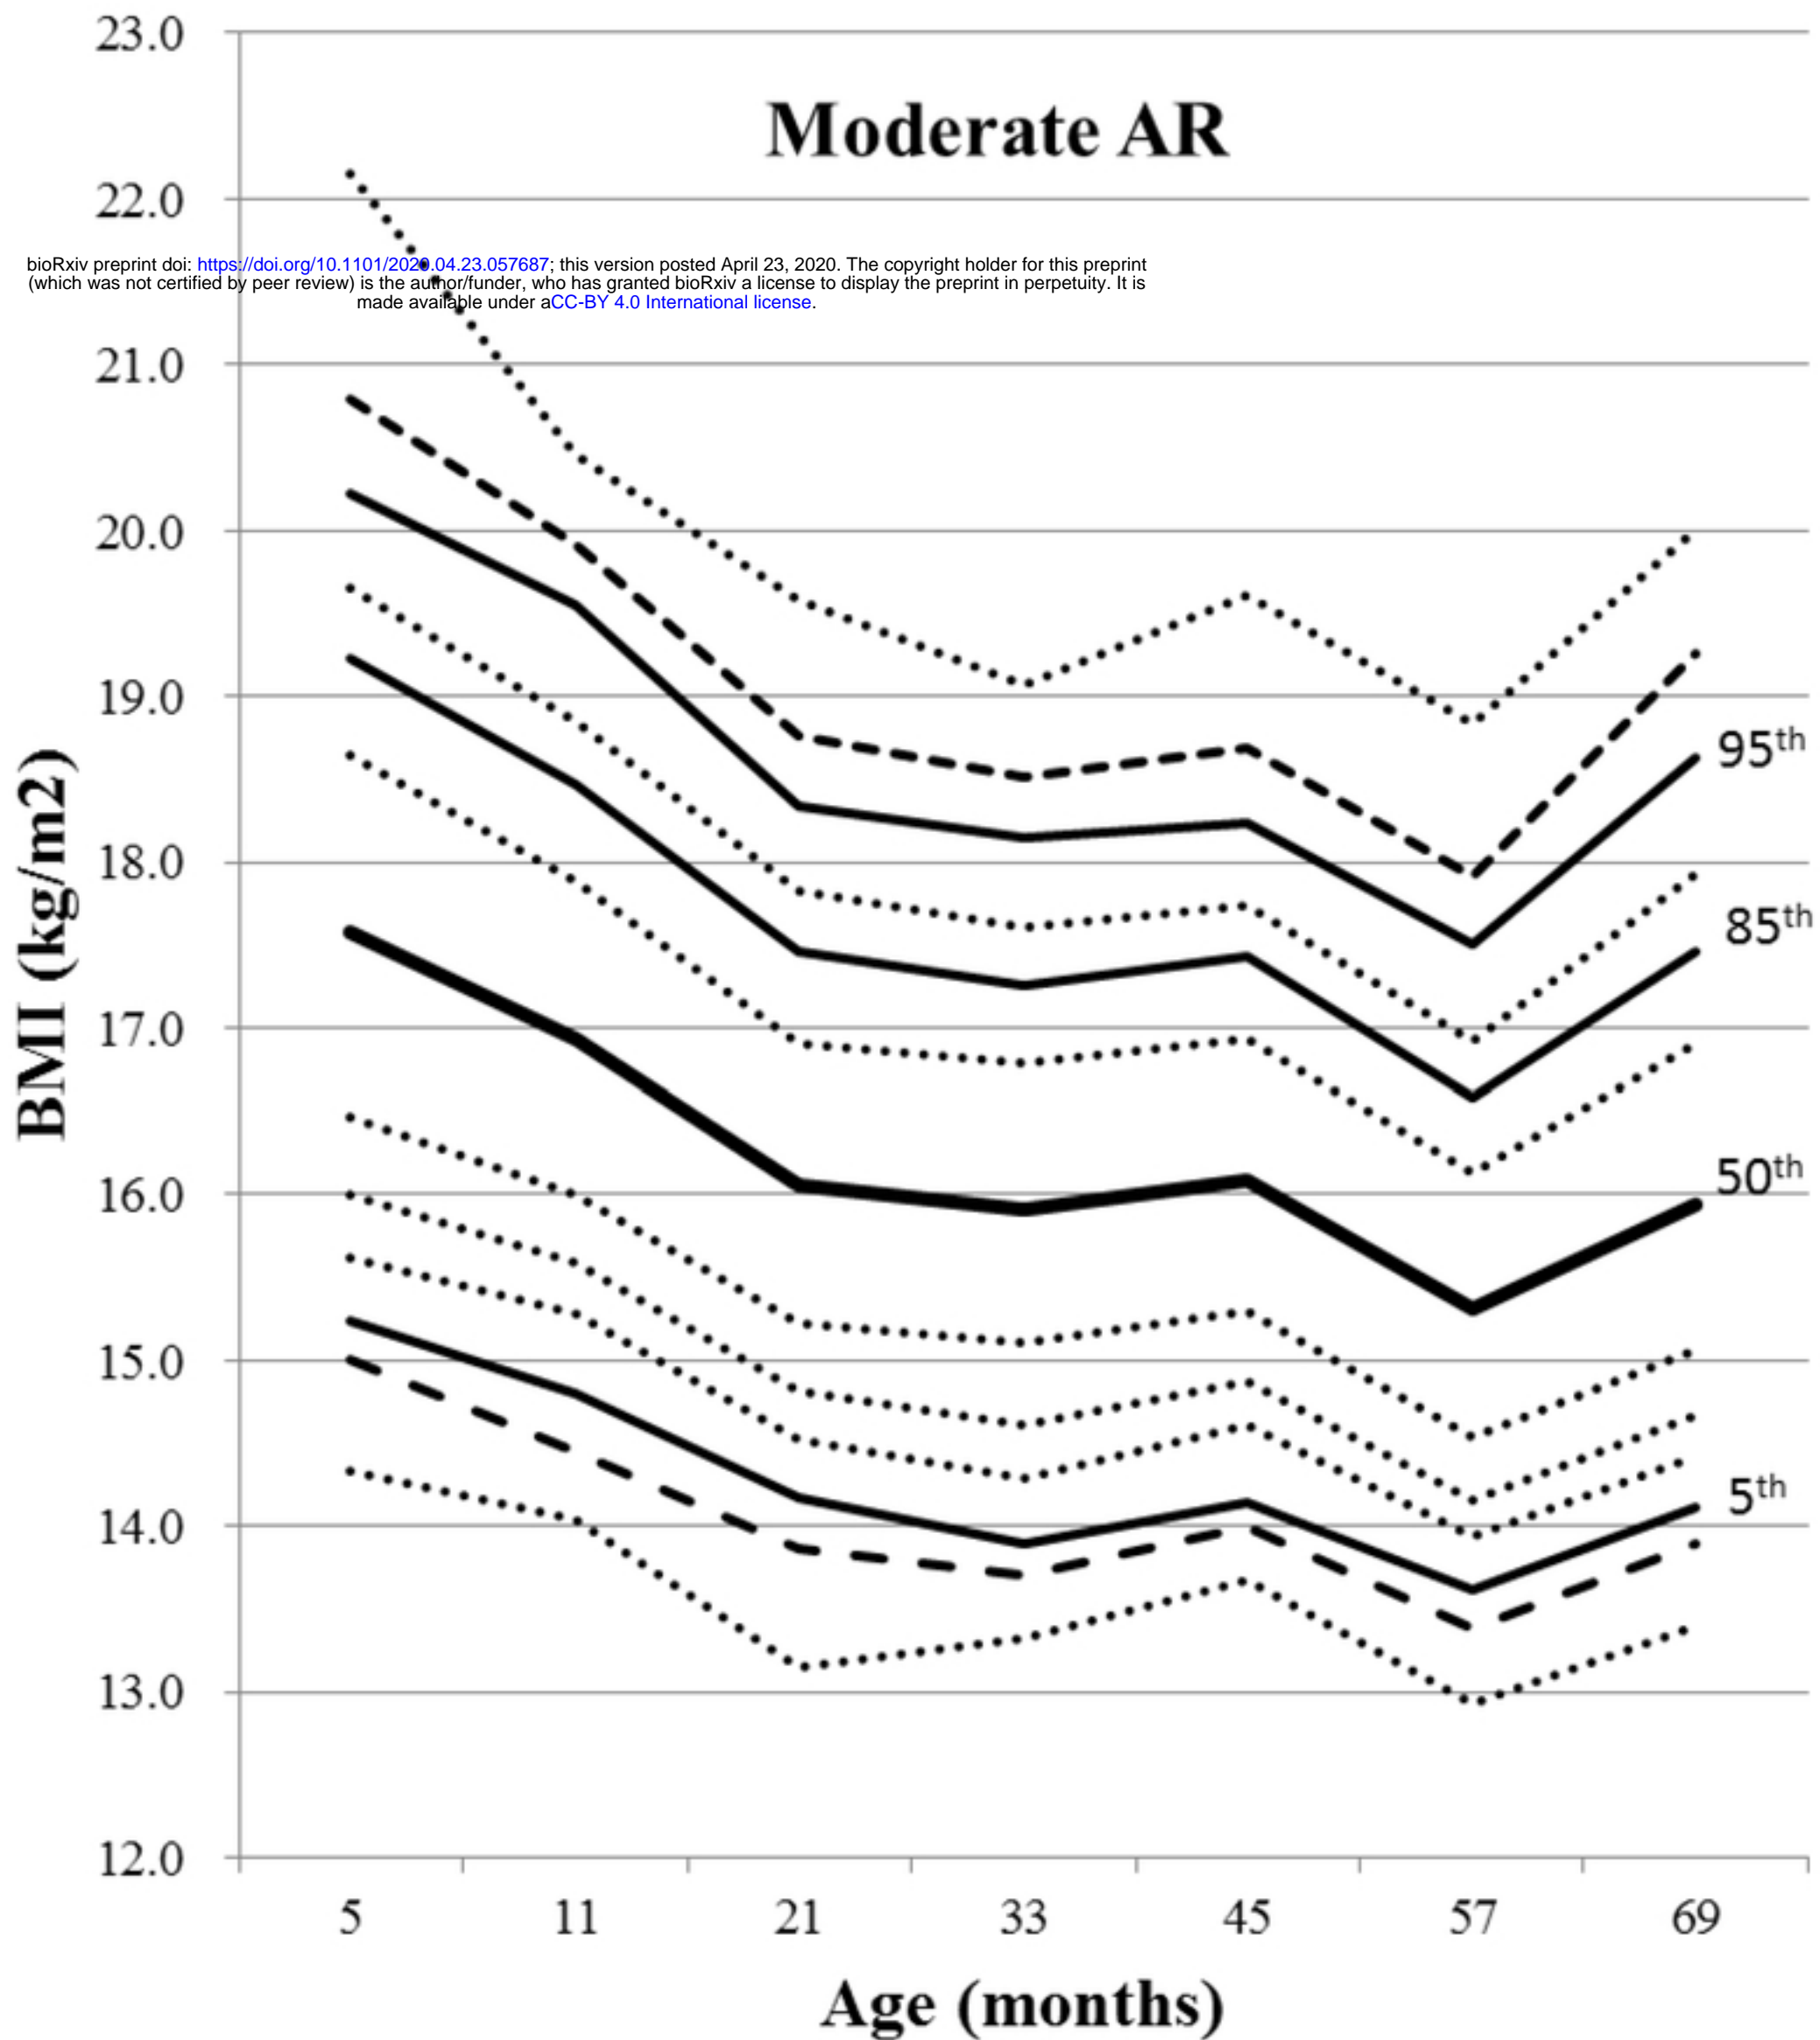

Fig 4E
